# Profiling of transcribed *cis*-regulatory elements in single cells

Jonathan Moody<sup>\*1</sup>, Tsukasa Kouno<sup>\*1</sup>, Akari Suzuki<sup>1</sup>, Youtaro Shibayama<sup>1</sup>, Chikashi Terao<sup>1</sup>, Jen-Chien Chang<sup>1</sup>, Fernando López-Redondo<sup>1</sup>, Chi Wai Yip<sup>1</sup>, Yoshinari Ando<sup>1</sup>, Kazuhiko Yamamoto<sup>1</sup>, Piero Carninci<sup>1,2</sup>, Jay W. Shin<sup>†1</sup>, Chung-Chau Hon<sup>†1</sup>

<sup>1</sup>RIKEN Center for Integrative Medical Sciences, Yokohama, Kanagawa, Japan 230-0045.

<sup>2</sup>Human Technopole, Via Cristina Belgioioso 171, Milano 20157, Italy.

\* These authors contributed equally

† Correspondence should be addressed to C.C.H ([chungchau.hon@riken.jp](mailto:chungchau.hon@riken.jp)) or J.W.S ([jay.shin@riken.jp](mailto:jay.shin@riken.jp))

## Abstract

Profiling of *cis*-regulatory elements (CREs, mostly promoters and enhancers) in single cells allows the interrogation of the cell-type and -state specific contexts of gene regulation and genetic predisposition to diseases. Here we demonstrate single-cell RNA-5'end-sequencing (sc-end5-seq) methods can detect transcribed CREs (tCREs), enabling simultaneous quantification of gene expression and enhancer activities in a single assay with no extra cost. We show enhancer RNAs can be effectively detected using sc-end5-seq methods with either random or oligo(dT) priming. To analyze tCREs in single cells, we developed *SCAFE* (Single Cell Analysis of Five-prime Ends) to identify genuine tCREs and analyze their activities (<https://github.com/chung-lab/scafe>). As compared to accessible CRE (aCRE, based on chromatin accessibility), tCREs are more accurate in predicting CRE interactions by co-activity, more sensitive in detecting shifts in alternative promoter usage and more enriched in diseases heritability. Our results highlight additional dimensions within sc-end5-seq data which can be used for interrogating gene regulation and disease heritability.

## Main text

### Introduction

Expression of genes specifying cell identity (i.e. cell-types and -states) is primarily controlled by the activities of their cognate CREs, mostly promoters<sup>1</sup> and enhancers<sup>2</sup>. These CREs are highly enriched in disease associated variants<sup>3</sup>, reflecting the importance of gene regulation in diseases. Therefore, understanding the cell-identity specific CRE activities not only helps to decipher the principles of gene regulation<sup>4,5</sup>, but also the cellular contexts of genetic predisposition to diseases<sup>6</sup>. While gene expression can be quantified with single-cell RNA-sequencing methods (sc-RNA-seq)<sup>7,8</sup>, profiling of CREs primarily relies on single-cell Assay for Transposase Accessible Chromatin using sequencing (sc-ATAC-seq)<sup>9,10</sup>, which measures the accessibility of chromatin regions in a binary manner (i.e. accessible or non-accessible)<sup>11</sup>. Several methods were developed for joint profiling of gene expression and chromatin accessibility within the same cell<sup>12–15</sup>, allowing the prediction of CREs interactions to their target genes (i.e. enhancer-to-promoter (EP) interactions), through cell-to-cell co-variations of their activities<sup>13,16</sup>. However, the close-to-binary nature and excess sparsity of chromatin accessibility data render the analyses of individual CREs in single cells challenging<sup>17</sup>. Also, a substantial fraction of accessible CREs that are distant from annotated promoters (i.e. distal aCREs) do not show the epigenomic features of active enhancers<sup>18</sup>. While an unknown fraction of these non-enhancer distal aCREs could be regulatory, e.g. insulators<sup>19</sup> or silencers<sup>20</sup>, their overall relevance in gene regulation remains elusive.

44 Alternatively, measuring the transcription at CRE (or tCRE) can be used as a proxy for their activity<sup>2</sup>, which  
45 can be achieved by sequencing the 5'ends of RNA<sup>21</sup> representing the transcription start sites (TSS) within  
46 the CREs<sup>1</sup>. Such measurement is highly quantitative and is ranked as the top feature for predicting active  
47 EP interactions in a machine-learning approach, compared to other epigenomic features<sup>22</sup>. In fact, the co-  
48 variation of transcription signals between CREs were shown to accurately predict individual cell-type-  
49 specific EP interactions<sup>23</sup>. In addition, transgenic enhancer assays showed endogenous transcription at a  
50 distal CRE is highly correlated with its ability to function as an enhancer<sup>24</sup>. These observations suggest  
51 distal CRE identified and quantified by transcription evidence, compared to solely chromatin accessibility  
52 evidence, could be more relevant to enhancer activation of gene expression.

53  
54 Previously, we demonstrated the application of sc-end5-seq in the integrated fluidic circuit-based C1<sup>TM</sup>  
55 platform (Fluidigm<sup>®</sup>) for detection of known TSS in hundreds of single cells<sup>25</sup>. In this study, we evaluated  
56 the sc-end5-seq methods on the droplet-based Chromium<sup>TM</sup> platform (10x Genomics<sup>®</sup>), with random and  
57 oligo(dT) priming, for *de novo* discovery and quantification of tCREs in thousands of single cells.  
58 Unexpectedly, both random and oligo(dT) priming methods effectively detected enhancer RNAs, which  
59 are supposed to be mostly non-polyadenylated (non-polyA)<sup>2</sup>. A major challenge in *de novo* discovery of  
60 tCREs from sc-end5-seq data is artifactual template switching (TS) reactions producing false TSS<sup>26,27</sup>.  
61 Therefore, we have devised a multiple logistic regression classifier to identify genuine TSS and effectively  
62 minimize false positives. Applying both sc-end5-seq and sc-ATAC-seq to peripheral blood mononuclear  
63 cells (PBMC) with immuno-stimulation, we compared the performance of tCREs and aCREs in: 1)  
64 identification of cell-type specific CREs, 2) detection of stimulation-induced transcription factor (TF)  
65 activities and 3) shifts in alternative promoter usage, 4) prediction of CRE interactions by co-activity, 5)  
66 enrichment in diseases heritability and 6) functional interpretations of disease associated variants. Finally,  
67 we developed *SCAFE*, a command-line tool to annotate genuine tCREs and predict their interactions from  
68 RNA-5'end-sequencing data.

## 69 Results

### 70 Assessing the performance of 3'end and 5'end sc-RNA-seq methods

71 While the sc-end5-seq method on the Chromium<sup>TM</sup> platform is primed with oligo(dT) (sc-end5-dT), we  
72 modified the protocol with random hexamer priming (sc-end5-rand), aiming for enhanced detection of non-  
73 polyA RNAs (see Methods)<sup>28,29</sup>. We then performed both sc-end5-dT and sc-end5-rand methods, along  
74 with the oligo(dT) primed 3'end sc-RNA-seq method (sc-end3-dT), on human dermal fibroblasts (DMFB)  
75 and induced pluripotent stem cells (iPSC) (Supplementary Fig. 1a). For comparison, CAGE, RNA-seq, and  
76 ATAC-seq were also performed in bulk on both cell lines (Fig. 1). In the following section, we focus on  
77 iPSC for the sake of clarity (Fig. 2; see Supplementary Fig. 2 for DMFB).

78  
79 First, we assessed the global distributions of reads. As expected, in sc-end5-rand more reads are mapped to  
80 ribosomal RNA (rRNA) (~15%) than in sc-end5-dT (~2%) (Fig. 2a, *upper panel, whole genome*). When  
81 considering reads mapped within genes (i.e., genic reads), the percentage of reads mapped to TSS is lower  
82 in both sc-end5-seq (~60%) than in bulk-CAGE (~85%) (Fig. 2a, *upper panel, within gene*), reflecting the  
83 greater extent of non-specific artefacts in sc-end5-seq, as discussed in the next section. We also note the  
84 genic reads of both sc-end5-seq methods and bulk-CAGE are strongly enriched at the 5'end of genes (Fig.  
85 2a, *middle panel*) and peaked precisely at the annotated TSS (Fig. 2a, *lower panel*), suggesting both sc-  
86 end5-seq methods can precisely pinpoint TSS.

87  
88 Next, we assessed the sensitivity of gene detection by sc-RNA-seq methods. When considering pooled  
89 single cells (i.e., pseudo-bulk), all three sc-RNA-seq methods showed similar sensitivities (Fig. 2b, *left*  
90 *panel*). However, when considering per-cell, both oligo(dT)-primed methods (i.e., sc-end3-dT and sc-end5-  
91 dT) detected ~30% more genes than the random-primed method (i.e., sc-end5-rand) at matched sequencing  
92 depths (Fig. 2b, *right panel*). This might be explained by lower complexity of the sc-end5-rand per-cell  
93 libraries, attributed to its higher rRNA read percentage and higher reads per unique molecular identifier  
94 (UMI) (Supplementary Fig. 1). Overall, the pseudo-bulk expression level of genes among the three sc-

95 RNA-seq methods are highly correlated (Fig. 2c), allowing datasets from these three sc-RNA-seq methods  
96 to be robustly integrated (Supplementary Fig. 3), and opening the possibility of joint-analyses of sc-end5-  
97 seq datasets with the many available sc-end3-dT public datasets.

98  
99 To further examine the differences between the two priming methods, we tested for the enrichment of  
100 subcellular compartment-specific RNAs (see Methods), non-polyA histone RNAs<sup>30</sup>, and long or short  
101 RNAs (see Methods). In the genes expressed higher in sc-end5-rand compared to sc-end5-dT, we observed  
102 strong enrichment of non-polyA histone RNAs (FDR <0.005, Fig. 2d). This is supported by the enrichment  
103 of chromatin-bound RNAs (FDR <0.005, Fig. 2d), which contain many nascent RNAs and non-polyA  
104 RNAs<sup>31</sup>. The significant enrichment of long RNAs (FDR <0.005, Fig. 2d) might be attributed to the higher  
105 reverse transcription efficiency of random priming within the body of the longer transcripts, in contrast to  
106 oligo(dT) priming which mainly from the 3' end of transcripts. Unexpectedly, sc-end5-dT also detected non-  
107 polyA histone RNAs with moderate expression (Fig. 2d), suggesting potential internal priming at A-rich  
108 sequences in sc-end5-dT, which has been also observed extensively in sc-end3-dT method<sup>32-34</sup>. In summary,  
109 these observations suggest a comparable performance in gene detection for the three sc-RNA-seq methods,  
110 with sc-end5-rand showing slightly lower per-cell sensitivity and sc-end5-dT showing unexpected  
111 detection of non-polyA RNAs.

### 112 TSS identification using sc-end5-seq methods

113 Previous reports suggested a fraction of TSS identified based on read 5' ends from TS reactions may not be  
114 genuine<sup>26,27</sup>, attributed to various artefacts including strand invasion<sup>27</sup> and other sources<sup>35</sup>. This results in  
115 excessive artifactual TSS, especially along the gene body known as “exon painting”<sup>36</sup>. While a fraction of  
116 these “exon painting” reads could be attributed to cleavage and recapping<sup>37</sup>, their exact molecular origins  
117 remain elusive. To this end, we developed a novel method in *SCAFE* to identify genuine TSS  
118 (Supplementary Fig. 4).

119  
120 First, we filter strand invasion artefacts based on the complementarity to TS oligo sequence<sup>35</sup> and found  
121 more strand invasion artefacts in sc-end5-rand (~5% reads) than in sc-end5-dT (~3% reads) (Supplementary  
122 Fig. 5). The filtered reads were then clustered. We found the proportion of TSS clusters along the gene  
123 body in both sc-end5-seq methods were still substantially higher than bulk-CAGE (Supplementary Fig. 6),  
124 consistent with the fact that “exon painting” is more prevalent in TS-based methods<sup>26</sup>. We benchmarked  
125 the properties of TSS clusters (Fig. 3a) and devised a classifier for genuine TSS using multiple logistic  
126 regression (see Methods) (Fig. 3b). Here we focus on the sc-end5-dT iPSC dataset for simplicity. First, the  
127 UMI counts within the TSS cluster (i.e. cluster counts) performed the worst (Area Under Receiver  
128 Operating Characteristic (ROC) Curve (AUC)=0.641) (Fig. 3a), and its performance decreases with  
129 sequencing depth (Fig. 3c). Two other common metrics, UMI count at TSS summit (i.e. summit count,  
130 AUC=0.725) and within  $\pm 75$ nt flanking its summit (i.e. flanking count, AUC=0.737) performed only  
131 marginally better than the cluster count (Fig. 3a,c), suggesting these commonly used metrics are at best  
132 mediocre classifiers for TSS. Since “exon painting” artefacts should be positively correlated with transcript  
133 abundance, we examined other metrics that are independent of RNA expression level, including UMI  
134 counts corrected for background expression (i.e. corrected expression, see Methods) and percentage of  
135 reads with 5' mismatched G<sup>26</sup> (i.e. unencoded-G percentage, see Methods). We found both metrics  
136 performed well across sequencing depths with AUC >0.9 (Fig. 3c).

137  
138 To devise a TSS classifier, we combined metrics using multiple logistic regression. We found the  
139 combination of flanking count, unencoded-G percentage and corrected expression is sufficient to achieve  
140 the best performance, with AUC >0.98 across sequencing depths (Fig. 3b,c). Its accuracy is high and robust  
141 for TSS clusters located in various genomic regions and across a wide range of cutoffs (Supplementary Fig.  
142 7a), which is well-validated by chromatin accessibility, promoter motifs, CpG island, sequence  
143 conservation (Supplementary Fig. 7b,c,d,e,f) and histone marks (Fig. 3d). At the default cutoff of 0.5, ~98%  
144 of sense exonic TSS clusters were removed (Fig. 3d, 3rd row). These removed TSS clusters are void of  
145 marks for active CREs (e.g., H3K27ac, H3K4me1 and H3K4me3) but overlap marks for transcription  
146 elongation (e.g., H3K36me3), suggesting our TSS classifier effectively removed “exon painting” artifacts.

147 In addition, the TSS clusters located at gene TSS are marked with a bimodal H3K4me1 pattern which  
148 indicates active promoters, in contrast to the others that are marked with relatively unimodal H3K4me1  
149 pattern which indicates active enhancers<sup>38,39</sup>. In summary, the *SCAFE* TSS classifier robustly distinguishes  
150 genuine TSS from artifacts.

### 151 **Defining tCRE using sc-end5-seq methods**

152 tCREs are defined in *SCAFE* by merging closely located TSS clusters and classified as either proximal or  
153 distal based on their distance to annotated gene TSS (Fig. 4a). Proximal tCRE can be interpreted as  
154 promoters of genes and promoter upstream transcripts (PROMPTs)<sup>40</sup>. Distal tCRE can be interpreted as  
155 mostly enhancers<sup>41</sup>, with an unknown, but likely minor, fraction of them as unannotated promoters (e.g.  
156 alternative promoters). To benchmark the sensitivity of tCRE detection, we also performed bulk-CAGE on  
157 chromatin-bound RNA (bulk-Chrom-CAGE), which captures the 5'ends of nascent transcripts for sensitive  
158 detection of short-lived RNAs (e.g. enhancer RNAs)<sup>31</sup> and can thus be viewed as a permissive baseline for  
159 their detection. First, we found similar proportions of tCREs defined as distal in sc-end5-dT (~10%) and  
160 sc-end5-rand (~12%) (Fig. 4b, *all tCRE*), suggesting a similar sensitivity of enhancer RNA detection in  
161 both methods. In addition, amongst distal tCREs the proportions of exonic, intergenic and intronic were  
162 similar across the bulk and single-cell 5'end methods (Fig. 4b, *distal tCRE*). Considering the excessive  
163 exonic TSS cluster in sc-end5-seq before filtering (Supplementary Fig. 6), it suggests the filtering step  
164 effectively minimized the “exon painting” artefacts in sc-end5-seq.  
165

166 Next we assessed the sensitivity of tCRE detection in various methods (Fig. 4c,d,e). As expected, bulk-  
167 Chrom-CAGE showed the highest sensitivity (Fig. 4c). Both sc-end5-seq methods detected ~50% to ~80%  
168 of those detected by bulk methods at matched sequencing depths (Fig. 4c). In pseudo-bulk, although sc-  
169 end5-rand seemed slightly more sensitive at lower depths (Fig. 4d, at ~50M), the sensitivity of both methods  
170 are similar at higher depths (Fig. 4d, at ~150M). When considered per-cell, however, sc-end5-dT is  
171 substantially more sensitive than sc-end5-rand (Fig. 4e). The tCREs identified in both methods are largely  
172 overlapping (Fig. 4f) and their expression levels are highly correlated (Fig. 4g). The high concordance of  
173 distal tCREs between sc-end5-dT and sc-end5-rand is unexpected, assuming a considerable fraction of  
174 these distal tCREs are enhancers, which produce mostly non-polyA RNAs<sup>2</sup>. To further investigate this, we  
175 examined the balanced bidirectionally transcribed enhancer loci in DMFB and iPSC (defined by bulk-  
176 CAGE as previously described<sup>2</sup>). Both sc-end5-dT and sc-end5-rand recapitulated these bulk-defined cell-  
177 type specific bidirectional transcription pattern at comparable number of enhancer loci (Fig. 4h), confirming  
178 that both sc-end5-seq methods detected enhancer RNAs with similar sensitivity. The unexpected detection  
179 of enhancer RNAs by sc-end5-dT could be attributed to the potential internal priming<sup>32-34</sup>, as discussed. In  
180 view of their similar pseudo-bulk performances (Fig. 4d,f,g,h) and the superior per-cell performance of sc-  
181 end5-dT (Fig. 4e), we performed sc-end5-dT and sc-ATAC-seq in PBMC for the comparison of tCRE and  
182 aCRE.

### 183 **Comparing tCRE and aCRE in PBMC**

184 We next defined tCREs (n = 30,180) and aCREs (n = 157,055) in PBMCs treated with PMA/ionomycin (i.e.,  
185 stimulated cell state) or DMSO (i.e., resting cell state) (Fig. 1, Supplementary Fig. 1). Gene-based cell-type  
186 annotations were transferred from the tCRE cells to aCRE cells using CCA<sup>42</sup> (Supplementary Fig. 8). Either  
187 UMAPs based on tCRE or aCRE show similar separation of cell-types and excellent integration of cell-  
188 states (Fig. 5a). Examining a subset of aCREs with cell-type specific chromatin accessibility (see Methods,  
189 Fig. 5b, *top row*), we found concordant patterns of cell-type specific RNA expression at the overlapping  
190 tCREs (Fig. 5b, *bottom row*). To examine cell-type specific TF activity, we applied *ChromVAR*<sup>43</sup> to both  
191 aCRE and tCRE to estimate TF motif activities and defined cell-type specific motifs (see Methods). These  
192 cell-type specific motifs based on aCRE and tCRE are significantly concordant in most cell-types  
193 (Supplementary Fig. 9a, Fisher's exact test, P < 0.05). Clustering of cell-types using TF motif activities  
194 appears to be consistent within broad categories with co-clustering of monocytes, lymphocytes and  
195 cytotoxic T-cells between aCRE and tCRE (Supplementary Fig. 9b). We further examined the activation  
196 of TF upon stimulation (see Methods) and observed a generally consistent upregulation of TF motif  
197 activities between aCREs and tCREs (Fig. 5c, mean Pearson's r = 0.84), which is mostly driven by *JUN/FOS*



198 related motifs that are components of the early immune responses. These results suggest both tCRE and  
199 aCRE can recover cell-type and -state specific contexts of gene regulation (i.e. CRE and TF activities).

200  
201 Co-activity of a pair of CREs can be used to predict their physical interactions<sup>16</sup>. Here we compared the  
202 accuracy of tCREs and aCREs in prediction of interacting CREs, using the co-activity estimated in *Cicero*<sup>16</sup>,  
203 benchmarked against promoter-capture Hi-C (PCHi-C)<sup>44</sup> (see Methods). Co-activity scores were estimated  
204 separately using cells within individual cell-types (i.e. cell-type sets) or all cells (i.e. pooled set). Here, we  
205 focus on a subset of CREs that is overlapping between tCRE and aCRE. First, we observed significantly  
206 higher co-activity scores for tCRE-pairs than aCRE-pairs (Fig. 5d,  $P < 2.2 \times 10^{-16}$  in K-S test for the pooled  
207 set, *solid line*). At co-activity scores  $\geq 0.2$ , we found the linked tCRE-pairs are significantly more likely to  
208 be validated by PCHi-C ( $\sim 40\%$ ) than the linked aCRE-pairs ( $\sim 10\%$ ) (Fig. 5e,  $P < 7 \times 10^{-6}$ , paired *t*-test for  
209 the cell-type sets). These results suggest tCREs are more accurate in predicting CRE interactions by co-  
210 activity.

211  
212 Alternative promoter usage is an important mechanism to increase transcriptome diversity for generation  
213 functionally distinct isoforms<sup>45</sup>. Here we examined the power of tCRE and aCRE to detect shifts in  
214 alternative promoter usage upon stimulation. First, we found 123 genes with significant shifts in tCRE (i.e.  
215 alternative promoter) usage upon stimulation in at least one cell-type (FDR  $< 0.05$  in *t*-test). We then  
216 examined the chromatin accessibility signals at the corresponding tCREs and observed only minimal extent  
217 of shifts in accessibility (Fig. 5f, *horizontal box plot, top*). Highlighting the *DHX30* locus (Fig. 5g), in T-  
218 cell:CD8:naïve, its expression shifts from Promoter#1 to Promoter#2 upon stimulation, whereas in  
219 Monocyte:CD14, no shift in expression occurs (Fig. 5f,h; Supplementary Fig. 10). In contrast, the  
220 chromatin accessibility at the two promoters remains mostly constant between the two states in all cell-  
221 types (Fig. 5h). These results suggest tCREs are generally more sensitive in detecting shifts in alternative  
222 promoter usage upon cell-state changes.

### 223 **Enrichment of trait associated variants in tCRE**

224 For interpretation of genetic predisposition, we examined the enrichment of trait heritability<sup>46</sup> in CREs from  
225 PBMCs. For comparison, we used tCRE defined with default and lenient logistic probability cutoffs (see  
226 Methods). As expected, we found both tCREs and aCREs are enriched in hematologic and immunologic  
227 traits, but generally not in psychiatric and metabolic traits (Fig. 6a, *top row*). The pattern is similar when  
228 considering proximal and distal CREs separately (Fig. 6a, *middle and bottom row*), implying that distal  
229 tCREs are biologically relevant. In addition, the enrichment in default tCREs is generally higher than that  
230 of lenient tCREs, particularly for distal tCREs (Fig. 6a), suggesting a higher proportion of default tCRE is  
231 biologically relevant. Nonetheless, we also noticed the default tCRE are less sensitive in terms of reaching  
232 statistical significance, which can be attributed to the smaller number of SNPs in default tCRE leading to  
233 larger estimates of standard error as reported<sup>47</sup>. For the sake of statistical power, we thus used lenient tCREs  
234 in the rest of the heritability enrichment analyses.

235  
236 As we observed a generally higher level of enrichment in default distal tCREs than in aCREs (Fig. 6a,  
237 *bottom row*), thus we reasoned transcription at CRE could be indicative to its activity and thus biological  
238 relevance. To this end, we investigated the heritability enrichment in aCREs with various levels of  
239 transcription evidence (Fig. 6b). About 45% of all aCREs showed evidence of transcription (i.e. transcribed  
240 aCRE, Fig. 6b, *top row, right panel*). This percentage is comparable to our estimate that  $\sim 47\%$  of aCREs  
241 are transcribed in DMFB based on bulk-CAGE with an unprecedented sequencing depth of 12,000M reads  
242 (Supplementary Fig. 11, based on FANTOM6 CAGE datasets<sup>48</sup>, see Methods), suggesting this percentage  
243 of transcribed aCRE in PBMC is a reasonable estimate despite limited sequencing depth at  $\sim 1,000$ M reads  
244 (Supplementary Fig. 1a). Untranscribed aCREs may be poised promoters, untranscribed enhancers,  
245 silencers, insulators or technical artifacts of sc-ATAC-seq<sup>18-20</sup>. These untranscribed aCREs are not enriched  
246 in heritability for most traits, in contrast to the transcribed aCREs which showed significant heritability  
247 enrichment (Fig. 6b, *top row, left panel*, FDR  $< 0.05$ ). The enrichment levels are dependent on the level of  
248 transcription, particularly in distal aCREs, where only  $\sim 15\%$  of which showed high evidence of  
249 transcription and are highly enriched in trait heritability (Fig. 6b, *bottom row*). These observations are

250 consistent with the previous reports<sup>2,24</sup> and highlight the importance of considering the evidence of  
251 transcription to identify active enhancers.

252  
253 We next examined the enrichment of heritability in cell-type specific CREs, which may be used to identify  
254 trait relevant cell-types (Fig. 6c,d; see Methods). As expected, immune cell-type specific CREs are not  
255 enriched in heritability of psychiatric and metabolic traits. Also, monocyte count heritability is enriched in  
256 monocyte specific CREs and leukocyte count heritability is enriched in CREs specific to most cell-types  
257 (Fig. 6c, *hematologic panel, solid dots*, FDR <0.05). Investigating the heritability of immunologic disorders,  
258 we found consistent and significant enrichment of T-cell, B-cell and NK cell-specific CREs in most  
259 disorders (FDR<0.05), recapitulating the general relevance of lymphoid cells in these disorders<sup>49</sup>. While  
260 the sensitivities of tCRE and aCRE in detection of heritability enrichments are generally comparable in  
261 most diseases (Fig.6c, *solid dots*), we observed a slightly higher sensitivity in aCRE in some diseases, such  
262 as SLE and rheumatoid arthritis. Next we compared the extent of cell-type specific enrichment of  
263 heritability<sup>46</sup> in tCRE and aCRE as a metric to prioritize cell-type relevance for each trait (Fig. 6d). We  
264 found an overall consistent cell-type ranking between tCRE and aCRE (mean Pearson's  $r=0.61$ ).  
265 Particularly, in Eczema with Pearson's  $r$  of 0.90, both tCRE and aCRE consistently ranked CD4+ T-cells  
266 as the most relevant cell-type, recapitulating the pivotal roles of Type-1 and -2 immune responses in skin  
267 inflammation<sup>50</sup>. We have also performed the same analyses for stimulation-responsive CREs in various  
268 cell-types, with similar conclusions (Supplementary Fig. 12). In summary, our data demonstrates the  
269 usability of tCRE in the identification and prioritization of trait relevant cell-types, which is comparable to  
270 that of aCREs.

### 271 **Functional annotation disease-associated variants using tCRE**

272 Lastly, we compared the use of tCRE and aCRE in functional annotation of disease-associated variants by  
273 linking to their target genes in relevant cell-types (see Methods). Using tCREs, on average ~41% of the  
274 trait-associated loci could be connected to a relevant cell-type specific CRE, compared to ~68% by aCRE  
275 (Fig. 6e). In addition, we found the number of genes associated by distal CRE is on average ~4.5 times  
276 lower in tCRE than aCRE. Since the total number of distal aCRE ( $n=129,679$ ) is much larger than distal  
277 tCRE ( $n=26,266$ ), the higher number of genes associated by distal aCREs is not surprising. However, given  
278 the lack of heritability enrichment in distal aCRE with no (62%) or low (23%) transcription evidence (Fig.  
279 6b), as well as the generally lower PCHi-C validation rate of aCRE co-activity links (Fig. 5c), the relevance  
280 of the genes associated by these untranscribed distal aCREs remains elusive, despite the high number. To  
281 this end, we highlighted an example gene, Prostaglandin E2 receptor 4 (*PTERG4*), located in proximity to  
282 the linkage disequilibrium (LD) block associated with multiple sclerosis, allergy, asthma, Crohn's disease  
283 and ulcerative colitis (Fig. 6f). We found a cluster of distal tCREs within these LD blocks (Supplementary  
284 Fig. 13), overlapping with multiple trait-associated variants and are linked by co-activity to the proximal  
285 tCREs of *PTERG4* (Fig. 6f). Finally, both distal and proximal tCREs of *PTERG4* are highly enriched in T-  
286 cells, agreeing with the pivotal roles of T-cells in autoimmune disorders<sup>51</sup> (Fig. 6g). These findings are  
287 consistent with a previous report demonstrating that this distal CREs found in Crohn's disease risk locus  
288 might regulate the expression of *PTGER4*<sup>52</sup>. In summary, these observations demonstrate the usability of  
289 single-cell tCRE activities in functional annotation of trait-associated variants with epigenomic and cellular  
290 contexts.

### 291 **Discussion**

292 Here we outlined an analysis framework using sc-end5-seq data to define tCRE in single cells, for  
293 interrogating gene regulation and disease heritability with cell-type specific contexts. Compared to  
294 accessibility data which is close-to-binary in nature<sup>17</sup>, transcription data is quantitative<sup>23</sup> and has a wider  
295 dynamic range. This might explain the higher accuracy in prediction of CRE interactions by co-activity in  
296 tCRE (Fig. 5e). In addition, the dynamic nature of transcriptome might better capture the fine granularities  
297 of gene regulation during rapid cell-state changes, which is reflected in the detection of shifts in alternative  
298 promoter usage by transcription data, but not by accessibility data (Fig. 5h). The lack of heritability  
299 enrichment in untranscribed aCREs (Fig. 6b), as well as the higher levels of heritability enrichment in distal  
300 tCRE (Fig. 6a), also highlight the importance of considering the evidence of transcription to identify active

301 and biologically relevant CREs. Although we demonstrated that sc-end5-seq methods can detect enhancer  
302 RNAs (Fig. 4h), the high level of dropouts (due to their low abundance) renders the analyses of enhancer  
303 RNAs in single cells challenging. One might partially alleviate the problem by pooling data from multiple  
304 cells (as meta-cells) for downstream analyses. Alternatively, constructing the sc-end5-seq libraries with  
305 nuclei instead of whole cells<sup>53</sup> or targeted capturing of a subset of enhancer RNAs<sup>54</sup>, should enrich enhancer  
306 RNAs in the library to improve dropouts. Currently, most datasets generated on the Chromium™ platform  
307 are from sc-end3-dT, while the sc-end5-dT method is used only when T- or B-cell receptor repertoire is a  
308 matter of concern. Although it is well-known that sc-end5-seq data can theoretically detect CRE activity  
309 with no extra cost, the lack of dedicated tools for data analyses, in particular *de novo* CRE discovery,  
310 prevented the wider adoption of this analysis framework. Here we developed *SCAFE* for dedicated analyses  
311 of tCREs (Supplementary Fig. 4) and we anticipate wide applications of sc-end5-seq methods along with  
312 this tool in the future for interrogating CREs in single cells.

### 313 **Data availability**

314 Data from this study have been submitted to ENA (Accession: #####). This data may be viewed on the  
315 Zenbu genome browser at [http://fantom.gsc.riken.jp/zenbu/gLyphs/#config=sc\\_tCRE\\_methods](http://fantom.gsc.riken.jp/zenbu/gLyphs/#config=sc_tCRE_methods)

### 316 **Code availability**

317 The *SCAFE* tool for processing 5'end RNA-seq data is available at <https://github.com/chung-lab/scafe>

## 318 **Methods**

### 319 **Human ethics**

320 All human samples examined in this study were either exempted material or were obtained with informed  
321 consent and covered under the research protocol (no. H30-9) approved by the ethics committees of the  
322 RIKEN Yokohama Campus.

### 324 **Genome version and gene models**

325 Human genome assembly version hg19 and gene models from GENCODE<sup>55</sup> version v32lift37 were used  
326 in all analyses of this study, unless otherwise stated.

### 328 **Preparing DMFB and iPSC samples**

329 DMFB from neonatal foreskin were purchased (Lonza®). Cells were cultured in Gibco Dulbecco's Modified  
330 Eagle Medium (DMEM, high glucose with L-glutamine) supplemented with 10% Fetal bovine serum (FBS)  
331 and penicillin/streptomycin. Cells were dissociated with trypsin 0.25% Ethylenediaminetetraacetic acid  
332 (EDTA) for 5 minutes (mins) at 37°C and washed twice in 0.04% Bovine serum albumin (BSA) in  
333 Phosphate-buffered saline (PBS). iPSC<sup>56</sup> were cultured in StemFit™ medium (Reprocell®) under feeder-  
334 free conditions at 37°C in a 5% CO2 incubator. The cells were plated on a culture dish pre-coated with  
335 iMatrix-511™ (Nippi®). Rock inhibitor (FUJIFILM Wako®) was added to the cells at a final concentration  
336 of 10µM during the first day of culturing. StemFit™ medium is refreshed daily until harvesting. The cells  
337 were dissociated and detached by incubating with TrypLE™ Select (Thermo Fisher®) followed by  
338 scrapping in StemFit™ medium. The cells were spin down and washed with 0.04% BSA in PBS twice.

### 340 **Preparing PBMC samples**

341 Human PBMCs were prepared from whole blood of a male healthy donor with Leucosep™ (Greiner®).  
342 Isolated 2×10<sup>6</sup> PBMC cells were incubated with PMA/ionomycin (i.e. stimulated) (Cell Activation Cocktail  
343 with Brefeldin A, Biolegend®), or DMSO as control (i.e. resting), for six hours.

### 345 **Isolating cytoplasmic, nucleoplasmic, and chromatin-bound RNAs**

346 Cell fractionation was carried out according to a previous study<sup>57</sup>. Briefly, cells grown to ~90% confluency  
347 in 10cm dishes were collected by trypsinization and washed once in PBS. The cells were lysed in lysis  
348 buffer, followed by separation of the nucleus from the cytoplasmic material by centrifugation in a sucrose

349 cushion. The isolated nucleus was rinsed once in PBS-EDTA and lysed by adding glycerol buffer and urea  
350 buffer in equal volumes. The precipitate, which contained the chromatin-RNA complex, was isolated by  
351 centrifugation and washed once in PBS-EDTA. RNA from each of the three subcellular compartments was  
352 isolated by Trizol™ (Thermo Fisher®).

### 354 **Bulk CAGE, RNA-seq and ATAC-seq library construction and sequencing for DMFB and iPSC**

355 Bulk CAGE libraries were generated by the nAnT-iCAGE<sup>58</sup> method as previously described and sequenced  
356 on HiSeq™ 2500 (Illumina®) as 50bp single-end reads. Bulk RNA-seq libraries was generated as  
357 previously described<sup>2</sup> and sequenced on HiSeq™ 2500 (Illumina®) as 100bp paired-end reads. Bulk ATAC-  
358 seq was performed as previously described<sup>59</sup> with slight modifications. Briefly,  $2.5 \times 10^4$  cells/ml were used  
359 for library preparation. Due to the more resistant membrane properties of DMFB, 0.25% IGEPAL™ CA-  
360 630 (Sigma-Aldrich®) were used for cell lysis. Transposase reaction was carried out as described in the  
361 protocol followed by 10 to 12 cycles of PCR amplification. Amplified DNA fragments were purified with  
362 MinElute™ PCR Purification Kit (QIAGEN®) and size-selected with AMPure™ XP (Beckman Coulter®).  
363 All libraries were examined in Bioanalyzer™ (Agilent®) for size profiles and quantified by KAPA™  
364 Library Quantification Kits (Kapa Biosystems®). Bulk ATAC-seq libraries were sequenced on HiSeq™  
365 2500 (Illumina®) as 50bp paired-end reads.

### 367 **sc-RNA-seq library construction and sequencing for DMFB and iPSC**

368 Freshly prepared iPSC and DMFB cells were loaded onto the Chromium™ Controller (10x Genomics®)  
369 on different days. Cell number and viability were measured by Countess™ II Automated Cell Counter  
370 (Thermo Fisher®). Final cell density was adjusted to  $1.0 \times 10^6$  cells/ml with >95% viability. Both cells were  
371 targeting ~5,000 cells per reaction. For sc-end3-dT libraries, we used Chromium™ Single Cell 3' Library  
372 kit v2 (10x Genomics®). Briefly, single cell suspensions were mixed with the Single cell Master Mix using  
373 Reverse transcription (RT) Primer (AAGCAGTGGTATCAACGCAGAGTACATr-GrGrG) and loaded  
374 together with 3' gel beads and partitioning oil into a Single Cell A Chips according to the manufacturer's  
375 instructions (10x Genomics®). For sc-end5-dT and sc-end5-rand libraries, used Single Cell 5' Library kit  
376 v1.1 (10x Genomics®). Single cell suspension was mixed with Single cell Master Mix using oligo(dT) RT  
377 primer (AAGCAGTGGTATCAACGCAGAGTACGAGAC-T(30)-VN) or random hexamer RT primer  
378 (AAGCAGTGGTATCAACGCAGAGTACNNNNNN) and loaded together with 5' gel beads and  
379 partitioning oil into a Single Cell A Chips according to the manufacturer's instructions. RNAs within single  
380 cells were uniquely barcoded and reverse transcribed within droplets. Both methods used Veriti™ Thermal  
381 Cycler (Applied Biosystems®) for RT reaction. After collecting cDNAs prepared from each method, they  
382 were amplified using cDNA primer mix from the kit, followed by the standard steps according to  
383 manufacturer's instructions. For iPSC and DMFB, six libraries (i.e. 3 methods  $\times$  2 cell lines) were barcoded  
384 by different indexes from i7 sample index plate (10x Genomics®). The libraries were examined in  
385 Bioanalyzer™ (Agilent®) for size profiles and quantified by KAPA™ Library Quantification Kits (Kapa  
386 Biosystems®). All libraries were sequenced on HiSeq™ 2500 (Illumina®) as 75 bp paired-end reads.

### 388 **sc-end5-dT and sc-ATAC-seq library construction and sequencing for PBMC**

389 Freshly prepared resting and stimulated PBMCs were subjected to sc-end5-dT (Single Cell 5' Library kit  
390 v1.1) and sc-ATAC-seq (Single Cell ATAC kit v1.1) library construction on the same day using the  
391 Chromium™ platform according to manufacturer's instructions (10x Genomics®). About 5,000 cells/nuclei  
392 were targeted per reaction. sc-end5-dT and sc-ATAC-seq libraries were sequenced on HiSeq™ 2500  
393 (Illumina®) as 75bp and 100bp paired-end reads respectively.

### 395 **Processing cell line bulk RNA-seq and CAGE data**

396 Reads were aligned to hg19 with *hisat2* v2.0.4<sup>60</sup>. For each sample, the first aligned base at the 5' end of read  
397 1 was piled up to a ctss (capped TSS) bed file using custom *perl* scripts. The ctss bed files were used for  
398 down sampling, feature intersection and counting.

### 400 **Processing of FANTOM6 bulk-CAGE data for DMFB**



Publicly available bulk-CAGE dataset on DMFB (n=1,163) were obtained<sup>48</sup>. Alignment bam files (on hg38) were converted to ctss files as described above and lifted over to hg19 using *liftover* (<http://genome.ucsc.edu>). All ctss files were pooled and subsampled to various depths. These subsampled ctss files were processed in the *SCAFE* workflows for *de novo* definition of TSS clusters and calculation of their logistic probabilities as described below.

### Processing of bulk ATAC-seq data

The bulk ATAC-seq data for DMFB and iPSC were processed using pipelines developed by the ENCODE consortium ([https://github.com/kundajelab/atac\\_dnase\\_pipelines](https://github.com/kundajelab/atac_dnase_pipelines)). The  $-\log(P)$  signal tracks for pooled replicates were used to defined gold-standards for training of the TSS classifiers.

### Processing of cell line sc-RNA-seq data

Reads were aligned to hg19 with *Cellranger*, and bam files were processed with *SCAFE* to generate filtered ctss files and *de novo* define tCRE. Annotation counts were produced by intersecting ctss files with GENCODE gene models. Metagene plots from overlapping ctss files with exons binned with Bioconductor *equisplit* using *foverlaps*. Enrichment of genesets in sc-end5-dT versus sc-end5-rand was tested using *fgsea v1.16.0*<sup>61</sup> with  $nperm = 1000$ . Genesets were defined as: 1) cytoplasmic, nucleoplasmic, and chromatin-bound RNAs:  $\log_2$  fold change  $\geq 2$  in fractionated CAGE compared to total CAGE, 2) long and short RNAs: maximum transcript length per gene  $\geq 25,000nt$  and  $< 1,000nt$ , 3) Non-polyA histone RNAs: histone RNAs with  $\log_2$  fold-change  $\geq 2$  in non-polyA fraction in a previous study<sup>30</sup>.

### Processing of PBMC sc-end5-dT data

Reads were aligned to hg19 with *Cellranger* and then processed with *Seurat v3*<sup>62</sup>. Cells were excluded with  $\geq 4$  median absolute deviation from the mean for number of features, UMI count, and percentage of mitochondrial UMI. Top 2,000 variable features were selected. Resting and stimulated PBMC samples were integrated with *Suerat CCA* using principal component (PC) 1 to 20 based on gene-based expression matrix. Bam files were processed with *SCAFE* to generate filtered ctss files and *de novo* define tCRE. tCRE matrices from *SCAFE* were added to the *Seurat* object for downstream analysis. Cell annotation was performed combining annotation from *scMatch (version GitHub master at 2020-10-10)*<sup>63</sup> and known marker genes. sc-end5-dT cell-type specific markers and stimulation specific markers were defined with modified *Seurat FindMarkers* to return all results ( $min.pct = 0$ ,  $return.thresh = Inf$ ,  $logfc.threshold = 0$ ,  $min.cells.group = 0$ ).

### Processing of PBMC sc-ATAC-seq

PBMC sc-ATAC resting and stimulated cells were processed with *SnapATAC v1.0.0*<sup>64</sup> with default parameters, selecting cells with  $\geq 40\%$  reads in peaks. Integrated with *Harmony v1.0*<sup>65</sup> using PC 1 to 20. sc-ATAC and sc-end5-dT were integrated using *SnapATAC FindTransferAnchors* and *TransferData* functions to transfer cell cluster annotations to the sc-ATAC-seq cells. sc-ATAC-seq peaks were defined per cell-type using *SnapATAC runMACS*, then merged. Cell-type specific markers and stimulation-specific markers were defined with *SnapATAC findDAR*.

### Estimating TF Motif activity

*ChromVAR v1.12.0*<sup>43</sup> was used to calculate per cell TF motif activities for the JASPAR2018<sup>66</sup> core motif set for tCRE or aCRE excluding chrM. The tCRE matrix was binarized prior to running. Fisher's exact tests and correlations of the top 80 motifs by *ChromVAR* deviation score per cell-type were used in Supplementary Fig 9.

### Predicting CRE interaction by co-activity

*Cicero v1.3.4.11*<sup>16</sup> was used for tCRE and aCRE present in 3 or more cells (all cells included, and separately subset to each cell-type) following default parameters. For comparisons between tCREs and aCREs, only a subset of CRE that are overlapped between tCREs and aCREs were used. We also excluded CREs pairs located within 10kb. A pair of CRE with co-activity score  $\geq 0.2$  is defined as "linked". PCHi-C

connections<sup>44</sup> (without cutoffs) from all cell-types were pooled and used for validation of co-activity linked CREs pairs.

### Detecting shifts in alternative promoter usage

For each cell type cluster (excluding dendritic cells due to low cell count), knn clustering of the *Seurat* SNN matrix ( $k=50$ ) was used to generate metacells. The proportion of each genes UMI arising from proximal tCREs was calculated for each metacell. Cell type specific tCRE switching events were identified using a t-test for differences in the proportion of gene UMI contributed from each tCRE between metacells of selected clusters and a background of all other clusters. ATAC-seq signal at a tCRE was defined as the maximum signal in cluster specific bigwig files generated with *SnapATAC runMACS*.

### Removal of strand invasion artifacts

Strand invasion artifacts, i.e. strand invaders, can be identified based on complementarity of genomic sequence upstream of the mapped reads to TS oligo sequence, according to a study<sup>35</sup>. Briefly, we extracted a 13nt genomic sequence immediately upstream of the 5'end of mapped reads, then globally aligned to the TS oligo sequence (TTTCTTATATGGG) and calculated the edit distance. A read is considered as an artifact of strand invasion when 1) the edit distance  $\leq 5$  and two of the three nucleotides immediately upstream were guanosines (Supplementary Fig.5), based on the previously proposed thresholds<sup>35</sup>.

### Identifying unencoded G

Previous studies suggest most reads derived from capped RNAs begin with an unencoded “G”, which can be used to distinguish genuine TSS from artifacts<sup>26,67</sup>. To precisely calculate the number of unencoded G for each mapped read, we first identify the junction between TS oligo and cDNA sequence and then examine the cDNA 5'end. Specifically, to precisely locate the TS oligo-cDNA junction, we considered only the reads 1) containing the last 5nt (i.e. 3'end) of TS oligo sequence (i.e. ATGGG) with maximum one mismatch, 2) starting with a softclip region (i.e. “S” in CIGAR string<sup>68</sup>) of  $\pm 50\%$  of the TS oligo sequence length (i.e. 6 to 20nt), 3) with a match region  $\geq 5$ nt (i.e. “M” in CIGAR string) following the softclip region. The 5'end of cDNA was defined as the first nucleotide immediately following the last nucleotide of the TS oligo sequence. The first 3nt of cDNA sequence was compared to the genomic sequence at their corresponding aligned position, and the number of Gs that are mismatched was defined as the number of unencoded G for the examined read.

### Defining TSS clusters and their properties

The 5' positions of reads (i.e. TSS) in *Cellranger* alignment *bam* files were extracted, piled-up by UMI, and clustered using *Paraclu*<sup>69</sup> using default parameters. Only TSS clusters with total UMI  $\geq 5$  and summit UMI  $\geq 3$  were retained. The following properties were extracted for each TSS cluster: 1) cluster count, 2) summit count, 3) flank count, 4) corrected expression and 5) unencoded G percentage. Cluster, summit and flank count refers to UMI counts within the cluster, at its summit, and within a region flanking its summit ( $\pm 75$ nt). Corrected expression refers to an expression value relative to its local background, based on the assumption that the level of exon painting artefact is positively correlated with the transcript abundance. Specifically, if the summit of a TSS cluster is located within genic regions, it will be assigned to either exon or intron, in either sense or antisense strand of the corresponding gene, or otherwise assigned to intergenic, as its local background. All annotated TSS regions ( $\pm 250$ nt) were masked from these local backgrounds. The density of UMI per nucleotide within each local background is calculated (i.e. local background density). The corrected expression of a TSS cluster is calculated as the ratio of the density of UMI within the region flanking its summit ( $\pm 75$ nt) to the density of its local background. Unencoded G percentage refers to the percentage of UMI within the cluster that has  $\geq 1$  unencoded G.

### Building a TSS classifier

To combine the five properties into a single classifier, we used multiple logistic regression implemented in the *caret*<sup>70</sup> R package. For training of this classifier, we defined a set of “gold standard” TSS clusters based on their ATAC-seq signal (as averaged  $-\log P$  within TSS cluster). Specifically, the top and bottom 5% of TSS clusters, ranked by their ATAC-seq signal, were defined as positive and negative gold standards, and

506 used for training of the logistic models at 5-fold cross-validation. The resulting logistic probability was  
507 used as the TSS classifier. The performance of this TSS classifier, as well as its constituent metrics, is  
508 measured as AUC, using the top and bottom 10% of TSS clusters as positive and negative gold standards  
509 for testing. The default cutoff of logistic probability at 0.5 is defined as the default threshold. All the TSS  
510 clusters in this study are filtered with this default cutoff. In the PBMC datasets, corresponding sc-ATAC-  
511 seq datasets were used for training and an additional lenient logistic probability cutoff of 0.028 was also  
512 used, which corresponds to a specificity of 0.5.

### 513 **Defining tCRE and aCRE**

514 tCREs are defined by merging closely located TSS clusters. Briefly, TSS clusters located within  $\pm 500$ nt of  
515 annotated gene TSS were classified as proximal, or as distal otherwise. All TSS clusters were then extended  
516 400nt upstream and 100nt downstream. These extended ranges were merged using *bedtools*<sup>71</sup>, in a strand-  
517 specific manner for proximal TSS clusters and non-strand-specific manner for distal TSS clusters, as  
518 proximal and distal tCRE respectively. Distal tCRE were then assigned to either exonic, intronic or  
519 intergenic, in this order. aCREs are defined by the ATAC peak ranges output from *SnapATAC*. aCREs  
520 located within  $\pm 500$ nt of annotated gene TSS were classified as proximal, or as distal otherwise.  
521

### 522 **Developing SCAFE tools**

523 *SCAFE* (Single Cell Analysis of Five-prime Ends) consists of a set of command-line tools written in *perl*  
524 and *R* programming languages, providing an end-to-end solution for processing of sc-end5-seq data. Briefly,  
525 it takes the read alignment file (bam), maps the cDNA 5'ends, identifies genuine TSS clusters, defines  
526 tCREs, annotated tCREs to gene models, quantify their expression and predicts tCRE interactions by co-  
527 activity. The tools in *SCAFE* can be ran individually as independent tools or ran serially as predefined  
528 workflows. For details please visit: <https://github.com/chung-lab/scafe>  
529

### 530 **Processing of GWAS data**

531 For heritability enrichment, GWAS summary statistics were obtained from (1) UK biobank heritability  
532 browser ([https://nealelab.github.io/UKBB\\_ldsc/index.html](https://nealelab.github.io/UKBB_ldsc/index.html)), (2) Dr. Alkes Price group site  
533 (<https://alkesgroup.broadinstitute.org/>) and (3) Japanese encyclopedia of genetic associations (JENGER,  
534 <http://jenger.riken.jp/>). Summary statistics obtained from (1) and (2) were directly used for heritability  
535 enrichment analyses, while the summary statistics obtained from (3) were pre-processed using  
536 “*munge\_sumstats.py*” scripts in *LDSC* software<sup>72</sup>. For linking trait associated variants to candidate genes,  
537 lead variants ( $P < 5 \times 10^{-8}$ ) were obtained from (1) GWASdb<sup>73</sup> (as of 19th August 2015,  
538 <http://jjwanglab.org/gwasdb>) and (2) NHGRI-EBI GWAS Catalog<sup>74</sup> (release r2020-07-15). The variants  
539 within the LD block of these lead variants (i.e. proxy variants) were searched for using *PLINK v1.9*<sup>75</sup> with  
540 an  $r^2 \geq 0.5$  within  $\pm 500$ kb in matched population panels of Phase 3 1000 Genomes Project downloaded  
541 from MAGMA website<sup>76</sup> ([http://ctg.cncr.nl/software/MAGMA/ref\\_data/](http://ctg.cncr.nl/software/MAGMA/ref_data/)). The final set trait-associated  
542 variants contain 158,745 variants for 10 immune disorders and 2 blood traits.  
543

### 544 **Estimating enrichment of trait heritability**

545 Enrichment of trait heritability in tCRE (or aCRE) was assessed by stratified LD score regression (S-LDSC)  
546 implemented in *LDSC* software. Briefly, sets of tCRE (or aCRE) were defined based on their proximity to  
547 annotated TSS (i.e. all, proximal or distal). Additional sets of tCREs were generated based on a more lenient  
548 logistic probability cutoff as mentioned above. Additional sets of aCREs were generated based on evidence  
549 of transcription (i.e. number of UMI from RNA reads). Annotation files and LD score files were generated  
550 for each set of tCRE (or aCRE) using the “*make\_annot.py*” and “*ldsc.py*” scripts using default parameters.  
551 Each set of tCRE (or aCRE) was added onto the 97 annotations of the baseline-LD model v2.2 and  
552 heritability enrichment (i.e. ratio of proportion of heritability to proportion of SNP) for each trait was  
553 estimated using the “*ldsc.py*” script with “*--h2*” flag in default parameters.  
554

### 555 **Evaluating cell-type specificity of trait heritability**

556 Cell-type specificity of trait heritability was assessed by LD score regression for specifically expressed  
557 genes (LDSC-SEG) implemented in *LDSC* software<sup>77</sup>. Briefly, enrichment of each tCRE (or aCRE) in each  
558

559 cell type were calculated using *findDAR* implemented in *SnapATAC* and *FindMarkers* in *Seurat*,  
560 respectively. Sets of “cell-type specific” tCRE (or aCRE) were defined as the top 20% of tCRE (or aCRE)  
561 ranked by the enrichment P for each cell type. A set of “core” tCRE (or aCRE) was defined as all tCREs  
562 (or aCREs) that are not “cell-type specific” to any of the cell types. Annotation files and LD score files  
563 were generated for each set of “cell-type specific” and “core” tCREs (or aCREs) using the “*make\_annot.py*”  
564 and “*ldsc.py*” scripts using default parameters. For each cell type, sets of “cell-type specific” and “core”  
565 tCRE (or aCRE) were added onto the 53 annotations of baseline-LD model v1.2 and the contribution of  
566 “cell-type specific” tCRE (or aCRE) to trait heritability (i.e. regression coefficient) for each trait was  
567 estimated using the “*ldsc.py*” script with “*--h2-cts*” flag in default parameters.

### 568 **Connecting trait-associated variants to candidate genes**

569 Trait associated variants were defined as mentioned above. A tCRE (or aCRE) is associated with a trait if  
570 it overlaps at least one trait-associated variant. A gene is associated with a trait when its proximal tCRE (or  
571 aCRE) is associated with a trait, or a distal tCRE (or aCRE) is associated with a trait and connected to its  
572 proximal tCRE by co-activity score  $\geq 0.2$ .

### 573 **Zenbu genome browser**

574 Most datasets in this study can be visualized in Zenbu genome browser. The Zenbu genome browser  
575 features on-the-fly demultiplexing single-cell or cell-type signals. Thus, single-nucleotide resolution signal  
576 within each single cell could be convenient interrogated. For details please visit:  
577 [https://fantom.gsc.riken.jp/zenbu/gLyphs/#config=sc\\_tCRE\\_methods](https://fantom.gsc.riken.jp/zenbu/gLyphs/#config=sc_tCRE_methods)  
578

### 579 **Data visualization and statistics**

580 We used R (<https://www.r-project.org/>) and the *ggplot2* R package<sup>78</sup> unless otherwise noted for  
581 visualizations.

### 582 **Acknowledgements**

583 This research was supported by research grant to RIKEN Center for Integrative Medical Sciences from  
584 Ministry of Education, Culture, Sports, Science and Technology (MEXT). We would like to extend our  
585 thanks to GeNAS sequencing platform in IMS.

### 586 **Conflict of Interest**

587 None

### 588 **Author contributions**

589 CCH, JWS, PC conceived the project and supervised the research. TK optimized experiments and  
590 constructed single cell libraries. JM and CCH analyzed most of the data. JM, TK, JWS, CCH wrote the  
591 manuscript. JCC processed the bulk-ATAC data. CWY processed the DMFB bulk CAGE data. CT assisted  
592 the heritability enrichment analysis. AS, KY performed the PBMC stimulation experiments. YS performed  
593 cell fractionated bulk RNA experiments. FLR performed bulk-ATAC-seq experiments. YA supported the  
594 logistics of sample collection.

## 595 **References**

- 596 1. Forrest, A. R. R. *et al.* A promoter-level mammalian expression atlas. *Nature* **507**, 462–470 (2014).
- 597 2. Andersson, R. *et al.* An atlas of active enhancers across human cell types and tissues. *Nature* **507**,  
598 455–461 (2014).
- 599 3. Maurano, M. T. *et al.* Systematic Localization of Common Disease-Associated Variation in  
600 Regulatory DNA. *Science* **337**, 1190–1195 (2012).
- 601 4. Heinz, S., Romanoski, C. E., Benner, C. & Glass, C. K. The selection and function of cell type-  
602 specific enhancers. *Nat. Rev. Mol. Cell Biol.* **16**, 144–154 (2015).
- 603 5. Catarino, R. R. & Stark, A. Assessing sufficiency and necessity of enhancer activities for gene  
604 expression and the mechanisms of transcription activation. *Genes Dev.* **32**, 202–223 (2018).



- 609 6. Boix, C. A., James, B. T., Park, Y. P., Meuleman, W. & Kellis, M. Regulatory genomic circuitry of  
610 human disease loci by integrative epigenomics. *Nature* **590**, 300–307 (2021).
- 611 7. Trapnell, C. Defining cell types and states with single-cell genomics. *Genome Res.* **25**, 1491–1498  
612 (2015).
- 613 8. Wagner, A., Regev, A. & Yosef, N. Revealing the vectors of cellular identity with single-cell  
614 genomics. *Nat. Biotechnol.* **34**, 1145–1160 (2016).
- 615 9. Buenrostro, J. D. *et al.* Single-cell chromatin accessibility reveals principles of regulatory variation.  
616 *Nature* **523**, 486–490 (2015).
- 617 10. Cusanovich, D. A. *et al.* A Single-Cell Atlas of In Vivo Mammalian Chromatin Accessibility. *Cell*  
618 **174**, 1309–1324.e18 (2018).
- 619 11. Chen, H. *et al.* Assessment of computational methods for the analysis of single-cell ATAC-seq data.  
620 *Genome Biol.* **20**, 241 (2019).
- 621 12. Chen, S., Lake, B. B. & Zhang, K. High-throughput sequencing of the transcriptome and chromatin  
622 accessibility in the same cell. *Nat. Biotechnol.* **37**, 1452–1457 (2019).
- 623 13. Cao, J. *et al.* Joint profiling of chromatin accessibility and gene expression in thousands of single  
624 cells. *Science* **361**, 1380–1385 (2018).
- 625 14. Ma, S. *et al.* Chromatin Potential Identified by Shared Single-Cell Profiling of RNA and Chromatin.  
626 *Cell* **183**, 1103–1116.e20 (2020).
- 627 15. Granja, J. M. *et al.* Single-cell multiomic analysis identifies regulatory programs in mixed-  
628 phenotype acute leukemia. *Nat. Biotechnol.* **37**, 1458–1465 (2019).
- 629 16. Pliner, H. A. *et al.* Cicero Predicts cis-Regulatory DNA Interactions from Single-Cell Chromatin  
630 Accessibility Data. *Mol. Cell* **71**, 858–871.e8 (2018).
- 631 17. Xiong, L. *et al.* SCALE method for single-cell ATAC-seq analysis via latent feature extraction. *Nat.*  
632 *Commun.* **10**, 4576 (2019).
- 633 18. Thibodeau, A., Uyar, A., Khetan, S., Stitzel, M. L. & Ucar, D. A neural network based model  
634 effectively predicts enhancers from clinical ATAC-seq samples. *Sci. Rep.* **8**, 16048 (2018).
- 635 19. Kim, T. H. *et al.* Analysis of the vertebrate insulator protein CTCF-binding sites in the human  
636 genome. *Cell* **128**, 1231–1245 (2007).
- 637 20. Pang, B. & Snyder, M. P. Systematic identification of silencers in human cells. *Nat. Genet.* **52**, 254–  
638 263 (2020).
- 639 21. Shiraki, T. *et al.* Cap analysis gene expression for high-throughput analysis of transcriptional  
640 starting point and identification of promoter usage. *Proc. Natl. Acad. Sci. U. S. A.* **100**, 15776–15781 (2003).
- 641 22. Whalen, S., Truty, R. M. & Pollard, K. S. Enhancer-promoter interactions are encoded by complex  
642 genomic signatures on looping chromatin. *Nat. Genet.* **48**, 488–496 (2016).
- 643 23. Rennie, S., Dalby, M., van Duin, L. & Andersson, R. Transcriptional decomposition reveals active  
644 chromatin architectures and cell specific regulatory interactions. *Nat. Commun.* **9**, 487 (2018).
- 645 24. Mikhaylichenko, O. *et al.* The degree of enhancer or promoter activity is reflected by the levels and  
646 directionality of eRNA transcription. *Genes Dev.* **32**, 42–57 (2018).
- 647 25. Kouno, T. *et al.* C1 CAGE detects transcription start sites and enhancer activity at single-cell  
648 resolution. *Nat. Commun.* **10**, 360 (2019).
- 649 26. Cumbie, J. S., Ivanchenko, M. G. & Megraw, M. NanoCAGE-XL and CapFilter: an approach to  
650 genome wide identification of high confidence transcription start sites. *BMC Genomics* **16**, 597 (2015).
- 651 27. Adiconis, X. *et al.* Comprehensive comparative analysis of 5'-end RNA-sequencing methods. *Nat.*  
652 *Methods* **15**, 505–511 (2018).
- 653 28. Cheng, J. *et al.* Transcriptional Maps of 10 Human Chromosomes at 5-Nucleotide Resolution.  
654 *Science* **308**, 1149–1154 (2005).
- 655 29. Kodzius, R. *et al.* CAGE: cap analysis of gene expression. *Nat. Methods* **3**, 211–222 (2006).
- 656 30. Yang, L., Duff, M. O., Graveley, B. R., Carmichael, G. G. & Chen, L.-L. Genomewide  
657 characterization of non-polyadenylated RNAs. *Genome Biol.* **12**, R16 (2011).
- 658 31. Hirabayashi, S. *et al.* NET-CAGE characterizes the dynamics and topology of human transcribed  
659 cis-regulatory elements. *Nat. Genet.* **51**, 1369–1379 (2019).
- 660 32. La Manno, G. *et al.* RNA velocity of single cells. *Nature* **560**, 494–498 (2018).

- 661 33. Gaidatzis, D., Burger, L., Florescu, M. & Stadler, M. B. Analysis of intronic and exonic reads in  
662 RNA-seq data characterizes transcriptional and post-transcriptional regulation. *Nat. Biotechnol.* **33**, 722–  
663 729 (2015).
- 664 34. 10x GENOMICS. Technical Note – Interpreting Intronic and Antisense Reads in Single Cell Gene  
665 Expression Data. [support.10xgenomics.com/permalink/3ItKYUsoESnDpnFNnfgvNT](https://support.10xgenomics.com/permalink/3ItKYUsoESnDpnFNnfgvNT).
- 666 35. Cvetic, N. *et al.* SLIC-CAGE: high-resolution transcription start site mapping using nanogram-  
667 levels of total RNA. *Genome Res.* **28**, 1943–1956 (2018).
- 668 36. Kanamori-Katayama, M. *et al.* Unamplified cap analysis of gene expression on a single-molecule  
669 sequencer. *Genome Res.* **21**, 1150–1159 (2011).
- 670 37. Affymetrix ENCODE Transcriptome Project & Cold Spring Harbor Laboratory ENCODE  
671 Transcriptome Project. Post-transcriptional processing generates a diversity of 5'-modified long and short  
672 RNAs. *Nature* **457**, 1028–1032 (2009).
- 673 38. Cheng, J. *et al.* A role for H3K4 monomethylation in gene repression and partitioning of chromatin  
674 readers. *Mol. Cell* **53**, 979–992 (2014).
- 675 39. Bae, S. & Lesch, B. J. H3K4me1 Distribution Predicts Transcription State and Poising at Promoters.  
676 *Front. Cell Dev. Biol.* **8**, 289 (2020).
- 677 40. Preker, P. *et al.* PROMoter uPstream Transcripts share characteristics with mRNAs and are  
678 produced upstream of all three major types of mammalian promoters. *Nucleic Acids Res.* **39**, 7179–7193  
679 (2011).
- 680 41. Yan, F., Powell, D. R., Curtis, D. J. & Wong, N. C. From reads to insight: a hitchhiker's guide to  
681 ATAC-seq data analysis. *Genome Biol.* **21**, 22 (2020).
- 682 42. Stuart, T. *et al.* Comprehensive Integration of Single-Cell Data. *Cell* **177**, 1888–1902.e21 (2019).
- 683 43. Schep, A. N., Wu, B., Buenrostro, J. D. & Greenleaf, W. J. chromVAR: inferring transcription-  
684 factor-associated accessibility from single-cell epigenomic data. *Nat. Methods* **14**, 975–978 (2017).
- 685 44. Javierre, B. M. *et al.* Lineage-Specific Genome Architecture Links Enhancers and Non-coding  
686 Disease Variants to Target Gene Promoters. *Cell* **167**, 1369–1384.e19 (2016).
- 687 45. Zhang, P. *et al.* Relatively frequent switching of transcription start sites during cerebellar  
688 development. *BMC Genomics* **18**, 461 (2017).
- 689 46. Finucane, H. K. *et al.* Partitioning heritability by functional annotation using genome-wide  
690 association summary statistics. *Nat. Genet.* **47**, 1228–1235 (2015).
- 691 47. Ni, G., Moser, G., Schizophrenia Working Group of the Psychiatric Genomics Consortium, Wray,  
692 N. R. & Lee, S. H. Estimation of Genetic Correlation via Linkage Disequilibrium Score Regression and  
693 Genomic Restricted Maximum Likelihood. *Am. J. Hum. Genet.* **102**, 1185–1194 (2018).
- 694 48. Ramilowski, J. A. *et al.* Functional annotation of human long noncoding RNAs via molecular  
695 phenotyping. *Genome Res.* **30**, 1060–1072 (2020).
- 696 49. Trynka, G. *et al.* Chromatin marks identify critical cell types for fine mapping complex trait variants.  
697 *Nat. Genet.* **45**, 124–130 (2013).
- 698 50. Akdis, M. *et al.* T helper (Th) 2 predominance in atopic diseases is due to preferential apoptosis of  
699 circulating memory/effector Th1 cells. *FASEB J. Off. Publ. Fed. Am. Soc. Exp. Biol.* **17**, 1026–1035 (2003).
- 700 51. Skapenko, A., Leipe, J., Lipsky, P. E. & Schulze-Koops, H. The role of the T cell in autoimmune  
701 inflammation. *Arthritis Res. Ther.* **7**, S4 (2005).
- 702 52. Libioulle, C. *et al.* Novel Crohn disease locus identified by genome-wide association maps to a gene  
703 desert on 5p13.1 and modulates expression of PTGER4. *PLoS Genet.* **3**, e58 (2007).
- 704 53. Grindberg, R. V. *et al.* RNA-sequencing from single nuclei. *Proc. Natl. Acad. Sci.* **110**, 19802–  
705 19807 (2013).
- 706 54. Mercer, T. R. *et al.* Targeted RNA sequencing reveals the deep complexity of the human  
707 transcriptome. *Nat. Biotechnol.* **30**, 99–104 (2012).
- 708 55. Frankish, A. *et al.* GENCODE reference annotation for the human and mouse genomes. *Nucleic  
709 Acids Res.* **47**, D766–D773 (2019).
- 710 56. Fort, A. *et al.* Deep transcriptome profiling of mammalian stem cells supports a regulatory role for  
711 retrotransposons in pluripotency maintenance. *Nat. Genet.* **46**, 558–566 (2014).
- 712 57. Conrad, T. & Ørom, U. A. Cellular Fractionation and Isolation of Chromatin-Associated RNA.  
713 *Methods Mol. Biol. Clifton NJ* **1468**, 1–9 (2017).

- 714 58. Murata, M. *et al.* Detecting expressed genes using CAGE. *Methods Mol. Biol. Clifton NJ* **1164**, 67–  
715 85 (2014).
- 716 59. Buenrostro, J. D., Wu, B., Chang, H. Y. & Greenleaf, W. J. ATAC-seq: A Method for Assaying  
717 Chromatin Accessibility Genome-Wide. *Curr. Protoc. Mol. Biol.* **109**, 21.29.1–21.29.9 (2015).
- 718 60. Kim, D., Paggi, J. M., Park, C., Bennett, C. & Salzberg, S. L. Graph-based genome alignment and  
719 genotyping with HISAT2 and HISAT-genotype. *Nat. Biotechnol.* **37**, 907–915 (2019).
- 720 61. Korotkevich, G. *et al.* Fast gene set enrichment analysis. *bioRxiv* 060012 (2021)  
721 doi:10.1101/060012.
- 722 62. Butler, A., Hoffman, P., Smibert, P., Papalexi, E. & Satija, R. Integrating single-cell transcriptomic  
723 data across different conditions, technologies, and species. *Nat. Biotechnol.* **36**, 411–420 (2018).
- 724 63. Hou, R., Denisenko, E. & Forrest, A. R. R. scMatch: a single-cell gene expression profile annotation  
725 tool using reference datasets. *Bioinformatics* **35**, 4688–4695 (2019).
- 726 64. Fang, R. *et al.* SnapATAC: A Comprehensive Analysis Package for Single Cell ATAC-seq. *bioRxiv*  
727 615179 (2020) doi:10.1101/615179.
- 728 65. Korsunsky, I. *et al.* Fast, sensitive and accurate integration of single-cell data with Harmony. *Nat.*  
729 *Methods* **16**, 1289–1296 (2019).
- 730 66. Khan, A. *et al.* JASPAR 2018: update of the open-access database of transcription factor binding  
731 profiles and its web framework. *Nucleic Acids Res.* **46**, D260–D266 (2018).
- 732 67. Kawaji, H. *et al.* Comparison of CAGE and RNA-seq transcriptome profiling using clonally  
733 amplified and single-molecule next-generation sequencing. *Genome Res.* **24**, 708–717 (2014).
- 734 68. Li, H. *et al.* The Sequence Alignment/Map format and SAMtools. *Bioinforma. Oxf. Engl.* **25**, 2078–  
735 2079 (2009).
- 736 69. Frith, M. C. *et al.* A code for transcription initiation in mammalian genomes. *Genome Res.* **18**, 1–  
737 12 (2008).
- 738 70. Kuhn, M. Building Predictive Models in R Using the **caret** Package. *J. Stat. Softw.* **28**, (2008).
- 739 71. Quinlan, A. R. & Hall, I. M. BEDTools: a flexible suite of utilities for comparing genomic features.  
740 *Bioinforma. Oxf. Engl.* **26**, 841–842 (2010).
- 741 72. Bulik-Sullivan, B. K. *et al.* LD Score regression distinguishes confounding from polygenicity in  
742 genome-wide association studies. *Nat. Genet.* **47**, 291–295 (2015).
- 743 73. Li, M. J. *et al.* GWASdb v2: an update database for human genetic variants identified by genome-  
744 wide association studies. *Nucleic Acids Res.* **44**, D869–876 (2016).
- 745 74. Buniello, A. *et al.* The NHGRI-EBI GWAS Catalog of published genome-wide association studies,  
746 targeted arrays and summary statistics 2019. *Nucleic Acids Res.* **47**, D1005–D1012 (2019).
- 747 75. Purcell, S. *et al.* PLINK: a tool set for whole-genome association and population-based linkage  
748 analyses. *Am. J. Hum. Genet.* **81**, 559–575 (2007).
- 749 76. de Leeuw, C. A., Mooij, J. M., Heskes, T. & Posthuma, D. MAGMA: generalized gene-set analysis  
750 of GWAS data. *PLoS Comput. Biol.* **11**, e1004219 (2015).
- 751 77. Finucane, H. K. *et al.* Heritability enrichment of specifically expressed genes identifies disease-  
752 relevant tissues and cell types. *Nat. Genet.* **50**, 621–629 (2018).
- 753 78. Wickham, H. *ggplot2: Elegant Graphics for Data Analysis*. (Springer-Verlag New York, 2016).  
754

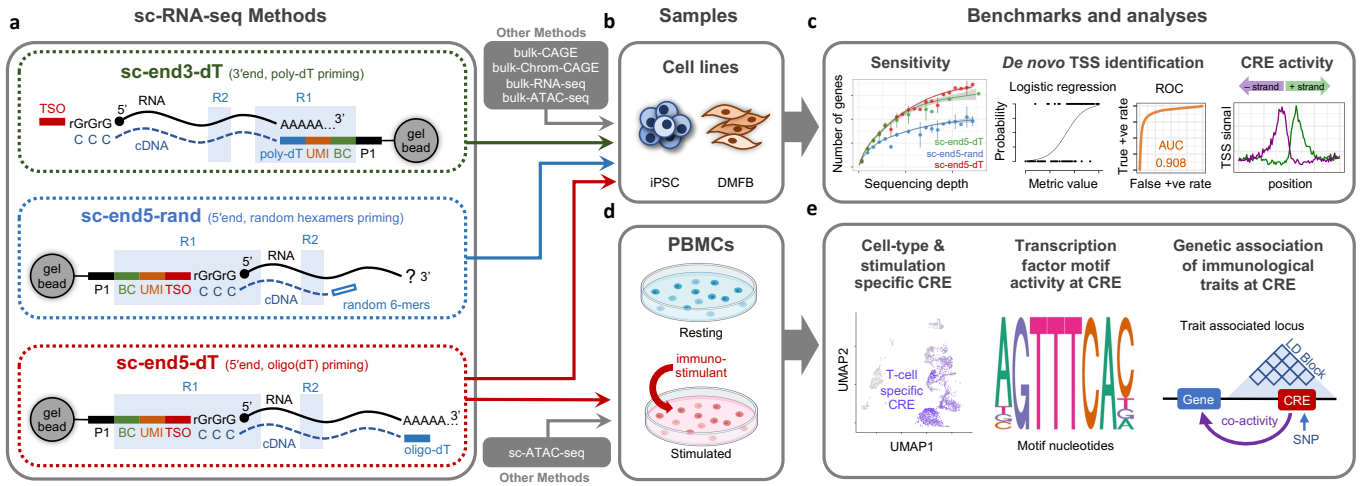

**Fig. 1: Overview of the experimental designs and benchmark analysis.** **a**, sc-RNA-seq methods used in this study. sc-end5-rand method is a custom method, and the other two methods are original methods on Chromium<sup>TM</sup> platform (10x Genomics<sup>®</sup>). (*BC*: cell barcode, *UMI*: unique molecular identifier, *TSO*: template switching oligonucleotide, *R1*: read 1, *R2*: read 2) **b**, two cell lines are used to compare the performance of the three sc-RNA-seq methods, with matched bulk transcriptome and epigenome datasets. **c**, the datasets from (**b**) were used for sensitivity assessment, *de novo* identifying TSS, detecting CRE activity. **d**, PBMCs, at resting and stimulated states, were profiled using sc-ATAC-seq and sc-end5-dT methods. **e**, the datasets from the two methods in (**d**) were compared in terms detection of cell-type/stimulation specific CRE, transcription factor motif activity and genetic association of traits.



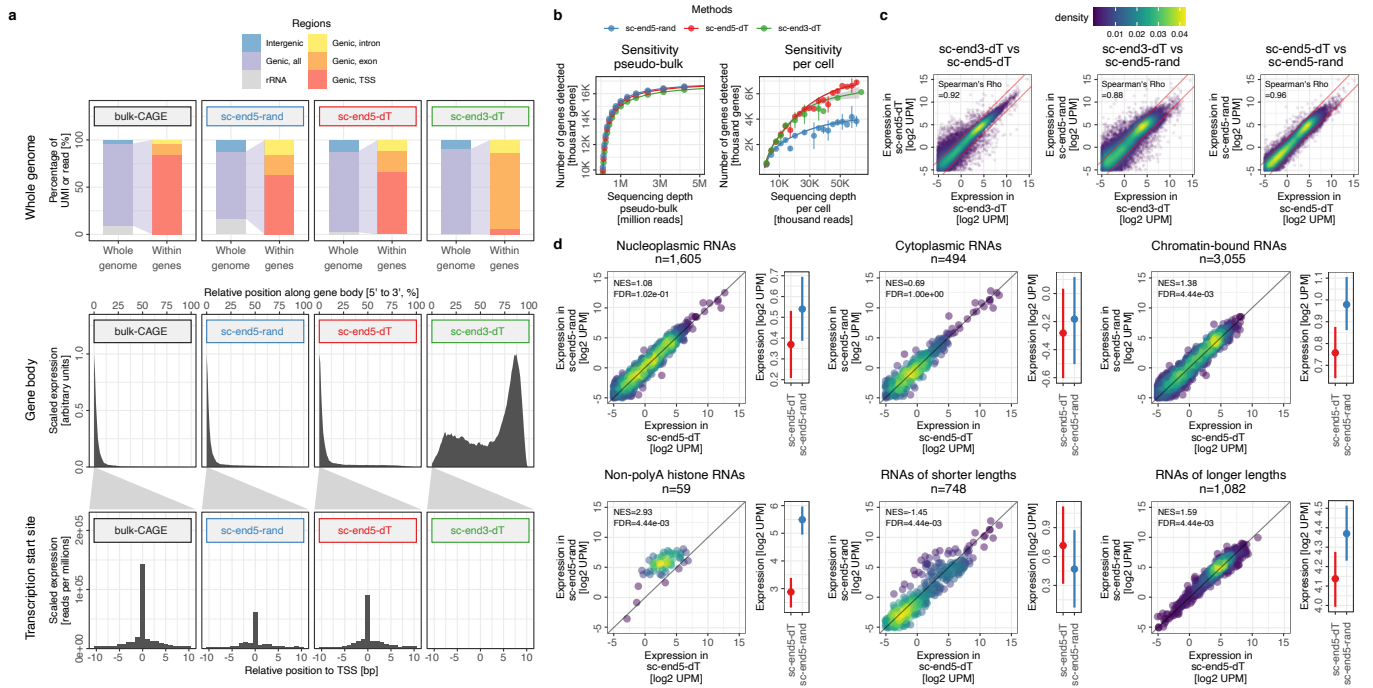

**Fig. 2: Performance of sc-RNA-seq methods.** *a*, distribution of reads from bulk-CAGE and sc-RNA-seq methods. *top*, distribution of reads in the whole genome; *middle*, distribution of reads along the gene body; *bottom*, distribution of reads in around annotated TSS. *b*, Sensitivity of gene detection in pseudo-bulk (*left*) and in single cells (*right*) across sequencing depth. Error bars represent standard deviation. The genes that are detected in bulk-RNA-seq were used as the scope. *c*, Correlation of gene expression levels between the pseudo-bulk data of the three sc-RNA-seq methods. *red line*,  $\pm 2$ -fold differences. UPM, UMI per million. Color represents the density of points. *d*, differences in the expression levels of RNAs with various properties between sc-end5-rand and sc-end5-dT. Gene Set Enrichment Analysis (GSEA) was performed on each RNA set; NES and FDR, normalized enrichment score and false discovery rate of GSEA. A positive NES value with FDR  $< 0.05$  refers to a significantly higher abundance of an RNA set in sc-end5-rand. (*right*) mean and standard errors.

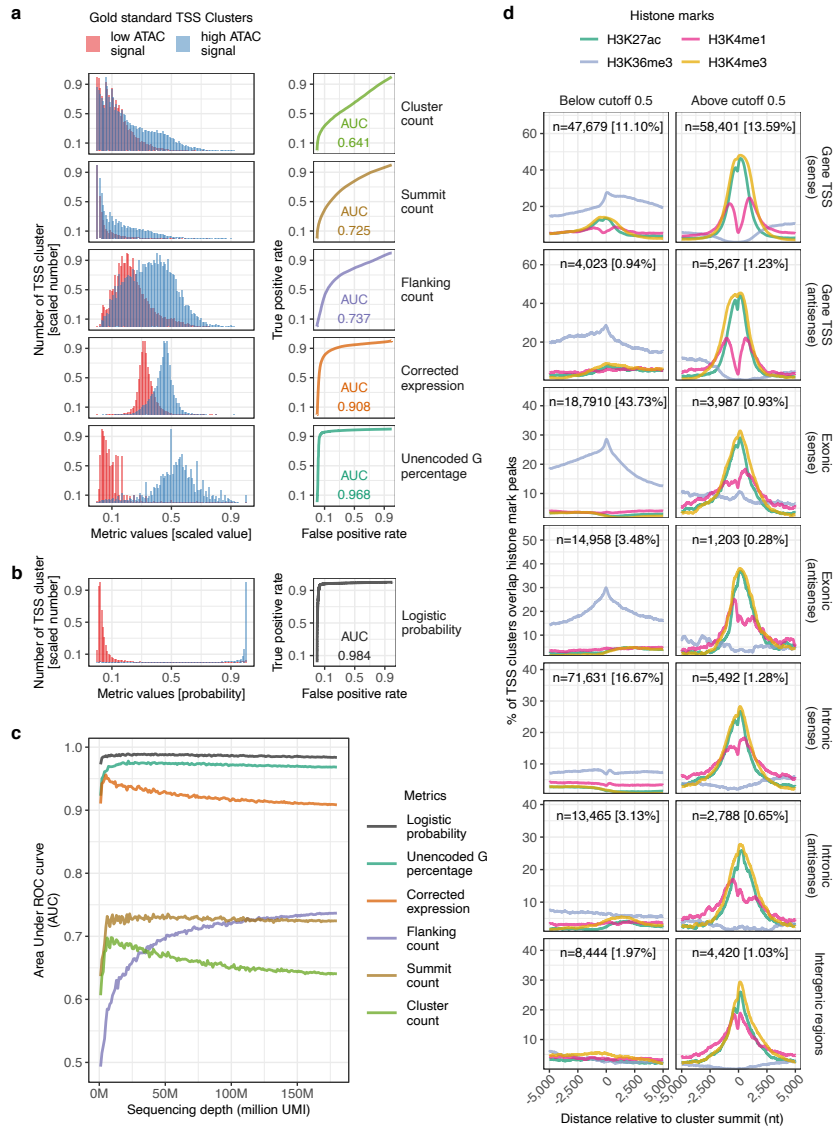

**Fig. 3: De novo identification of genuine TSS.** *a*, properties of gold-standard TSS clusters (*left*) and their performance as a TSS classifier measured as Area Under Receiver Operating Characteristic (ROC) Curve (AUC) (*right*). *b*, logistic probability of gold-standard TSS clusters (*left*) and its performance as a TSS classifier measured as AUC (*right*). *c*, performance of various metrics as a TSS classifier in (*a*) and (*b*) across various sequencing depth. *d*, histone marks at TSS clusters with logistic probability below (*left*) or above (*right*) 0.5 cutoff, at annotated gene TSS, exonic or intronic regions in sense or antisense orientations, or otherwise intergenic regions. *n*, number of TSS clusters. %, percentage of TSS clusters in all genomic locations regardless of logistic probability thresholds.

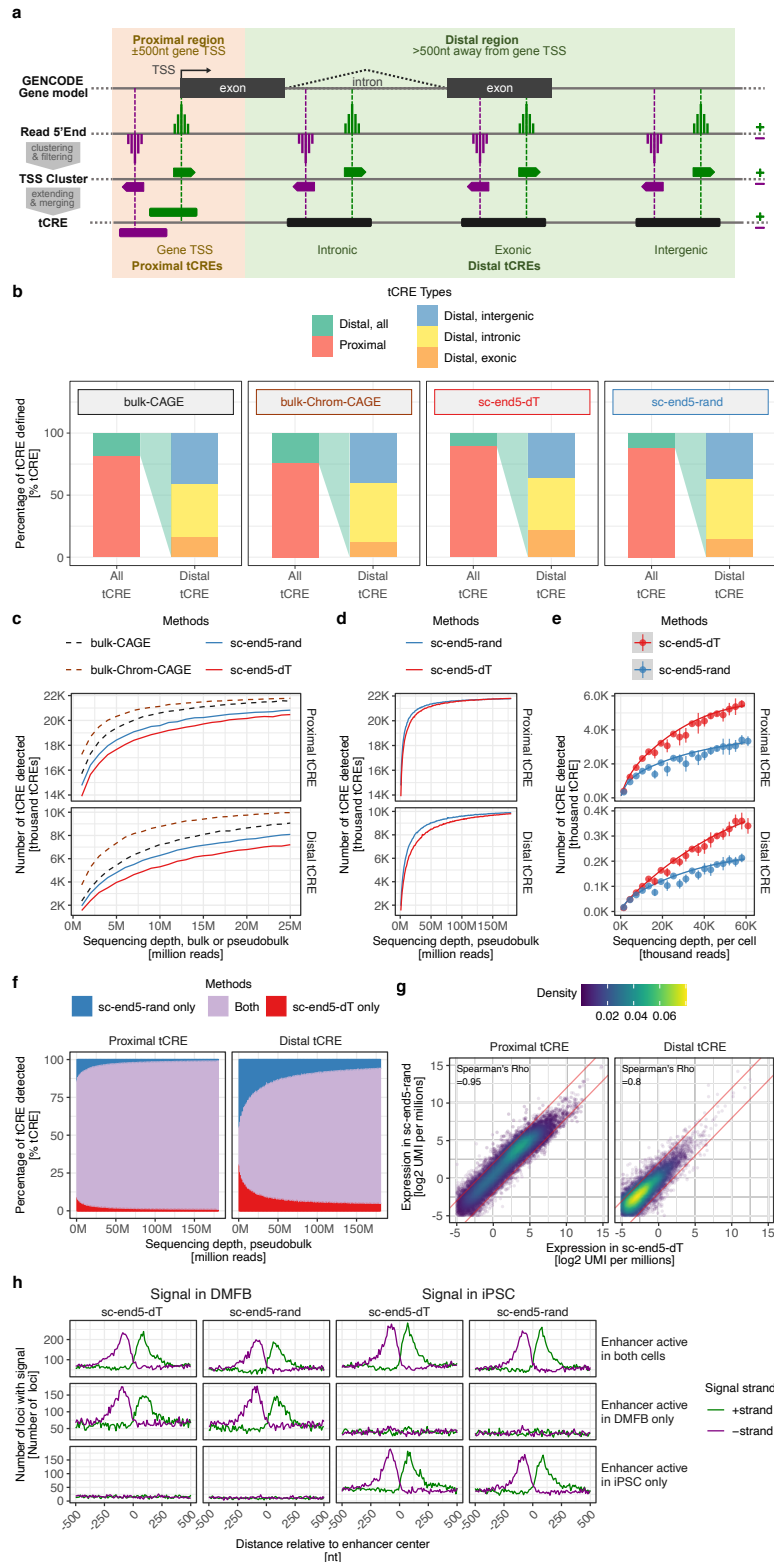

**Fig. 4: Definition and properties of tCRE.** **a**, defining tCRE by merging closely located TSS clusters. Distance to gene TSS was used as the criteria to define proximal or distal tCRE. Proximal and distal TSS clusters were merged in stranded and strandless manner, respectively. Distal tCREs are further classified as intronic, exonic, or otherwise intergenic. **b**, proportion of tCREs types defined from sc-end5-dT and sc-end5-rand pseudo-bulk, compared to bulk-CAGE and bulk-Chrom-CAGE. All four libraries were subsampled to 25 million reads. **c**, Sensitivity of tCRE detection in sc-end5-dT and sc-end5-rand pseudo-bulk, compared to bulk-CAGE and bulk-Chrom-CAGE, from 1 to 25 million reads. **d**, sensitivity of tCRE detection in sc-end5-dT and sc-end5-rand pseudo-bulk, from 1 to 150 million reads. **e**, Sensitivity of tCRE detection in sc-end5-dT and sc-end5-rand in single cells, from 1,000 to 60,000 reads per cell. Error bars represent standard deviation. **f**, Proportion of overlap in tCRE detected in sc-end5-seq pseudo-bulk from 1 to 150 million reads. **g**, correlation of tCRE levels between the pseudo-bulk data of the two sc-end5-seq methods. *red line*,  $\pm 2$ -fold differences. UPM, UMI per million. **h**, count of overlapping enhancer loci in pseudo-bulk sc-end5-dT and sc-end5-rand at bidirectional enhancer loci defined in bulk-CAGE, separated into cell-type specificity by overlap with bulk-ATAC-seq peaks.





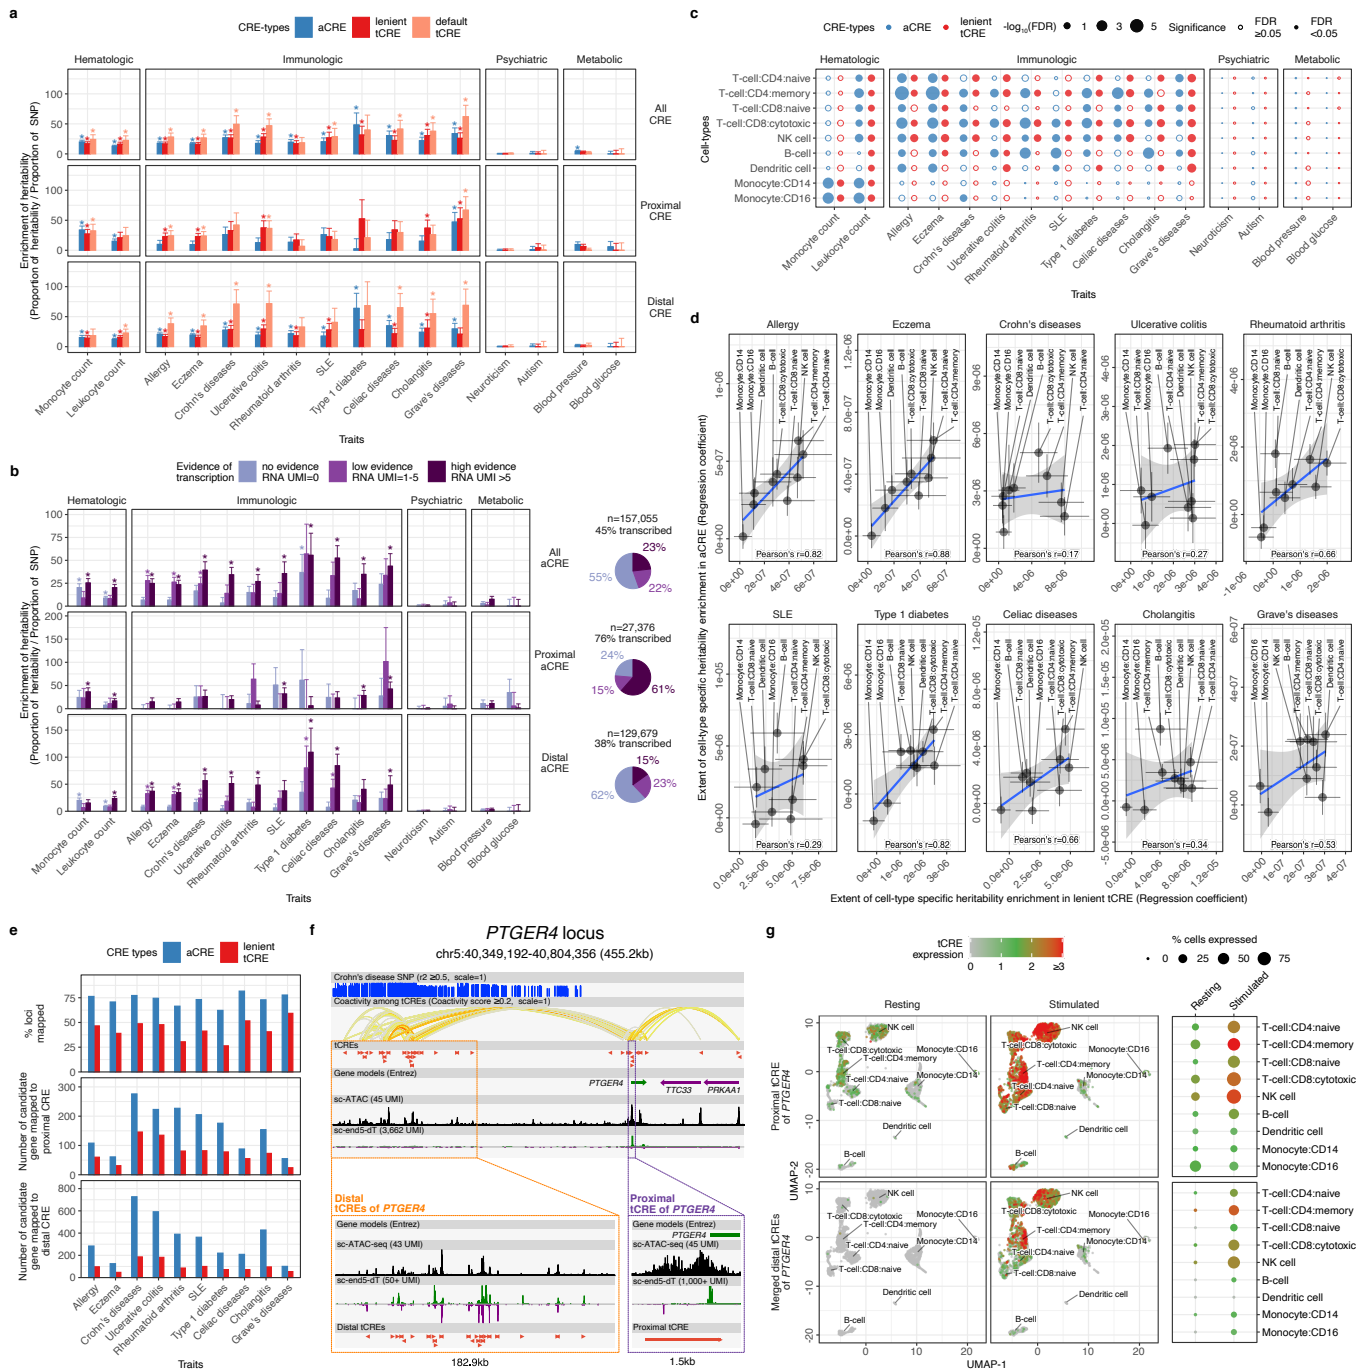

**Fig. 6: Disease-associated variants at tCRE and aCRE in PBMCs.** **a**, Enrichment of heritability in various CRE types. *Y-axis*, enrichment of heritability is measured as the ratio of proportion of heritability to proportion of SNP, in LDSC. *Error bars*, standard error of the estimate. Asterisks, significant enrichments with FDR <0.05. **b**, Enrichment of heritability in aCREs with various levels of evidence of transcription. *Y-axis*, *error bars*, and *asterisks* are the same as in **(a)**. **c**, Enrichment of heritability in cell-type specific CREs. *Solid circles*, significant enrichments with FDR <0.05. **d**, Ranking of cell-type relevance to diseases based on heritability enrichment. Regression coefficient, from the analysis in **(c)**, can be interpreted as the extent of heritability enrichment, and thus cell-type relevance. *Error bars*, standard error of the estimate. *Blue line* and *grey shade*, linear regression mean and 95% confidence intervals. **e**, Mapping disease-associated variants to candidate genes using CREs with cell-type/state contexts. Top, percentage of loci with at least 1 candidate gene mapped. *Middle* and *bottom*, number of candidate genes mapped using proximal and distal CREs, respectively, with cell-type/state contexts. **f**, Genetic signals and tCREs at a Crohn's disease risk locus in close to *PTGER4*. Crohn's disease SNP, in LD with  $r^2 \geq 0.5$ , represented by the height of the bars. Co-activity among tCREs, with score  $\geq 0.2$  in *Cicero*, is represented by the color of the arcs. Resting and stimulated PBMC data were pooled in the sc-ATAC-seq and sc-end5-dT tracks. *Green* and *blue bars* in the sc-end5-dT track represent the forward and reverse strand signal. The view was generated in the Zenbu genome browser with modifications. **g**, Cell-types/states specific activity of proximal and distal tCREs of *PTGER4*. Merged distal tCREs refers to the sum of expression values of 20 closely located distal tCREs, as detailed in Supplementary Fig.13.

**a**

| Cell-type (State), Method     | Estimated Cell Number | Number of Reads | Mean Reads per Cell | Median Genes per Cell | Median UMI Counts per Cell |
|-------------------------------|-----------------------|-----------------|---------------------|-----------------------|----------------------------|
| DMFB (culture), sc-end3-dT    | 9,339                 | 280,630,717     | 30,049              | 3,264                 | 12,335                     |
| DMFB (culture), sc-end5-dT    | 9,130                 | 336,596,368     | 36,867              | 3,948                 | 13,731                     |
| DMFB (culture), sc-end5-rand  | 11,891                | 489,341,205     | 41,152              | 2,025                 | 3,661                      |
| iPSC (culture), sc-end3-dT    | 2,631                 | 356,069,521     | 135,336             | 5,998                 | 35,953                     |
| iPSC (culture), sc-end5-dT    | 5,961                 | 326,157,474     | 54,715              | 4,896                 | 18,528                     |
| iPSC (culture), sc-end5-rand  | 5,736                 | 453,892,184     | 79,130              | 2,962                 | 5,967                      |
| PBMC (resting), sc-end5-dT    | 3,773                 | 525,045,581     | 139,158             | 1,596                 | 4,576                      |
| PBMC (stimulated), sc-end5-dT | 4,860                 | 474,684,054     | 97,671              | 1,136                 | 4,323                      |

**b**

| Cell-type (State), Method      | Estimated Cell Number | Number of Fragments | Median Fragments per Cell | Fraction of Fragments Overlapping Peaks |
|--------------------------------|-----------------------|---------------------|---------------------------|-----------------------------------------|
| PBMC (resting), sc-ATAC-seq    | 3,712                 | 303,073,907         | 17,162                    | 0.47                                    |
| PBMC (stimulated), sc-ATAC-seq | 3,401                 | 134,342,769         | 16,164                    | 0.68                                    |

**Supplementary Fig. 1: Statistics of sc-RNA-seq and sc-ATAC-seq libraries in this study. a,** Statistics of sc-RNA-seq libraries. **b,** Statistics of sc-ATAC libraries. All numbers were extracted from the reports generated from standard 10x Genomics™ tool *Cellranger*.

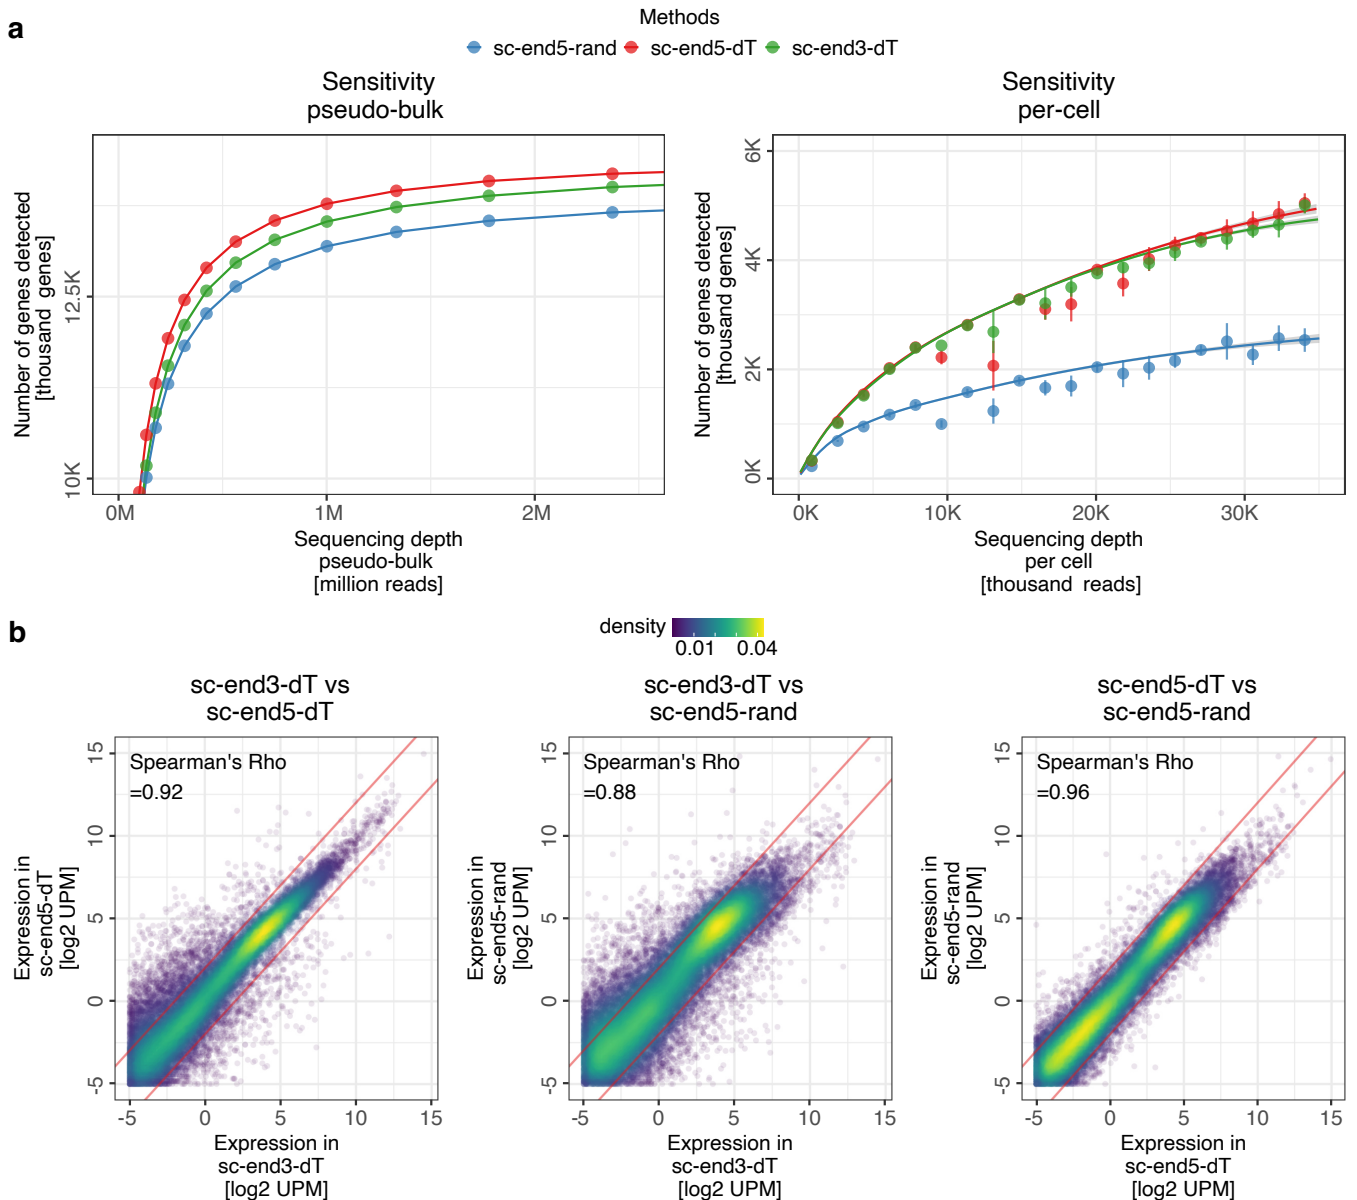

**Supplementary Fig. 2: Performance of sc-RNA-seq methods in DMFB.** **a**, Sensitivity of detection of genes in pseudo-bulk (*left*) and in single cells (*right*) across sequencing depth. Error bars represent standard deviation. The genes that are detected in bulk-RNA-seq were used as the scope. **b**, Correlation of gene expression levels between the pseudo-bulk data of the three sc-RNA-seq methods. *red line*,  $\pm 2$ -fold differences. UPM, UMI per million. Color represents the density of points.

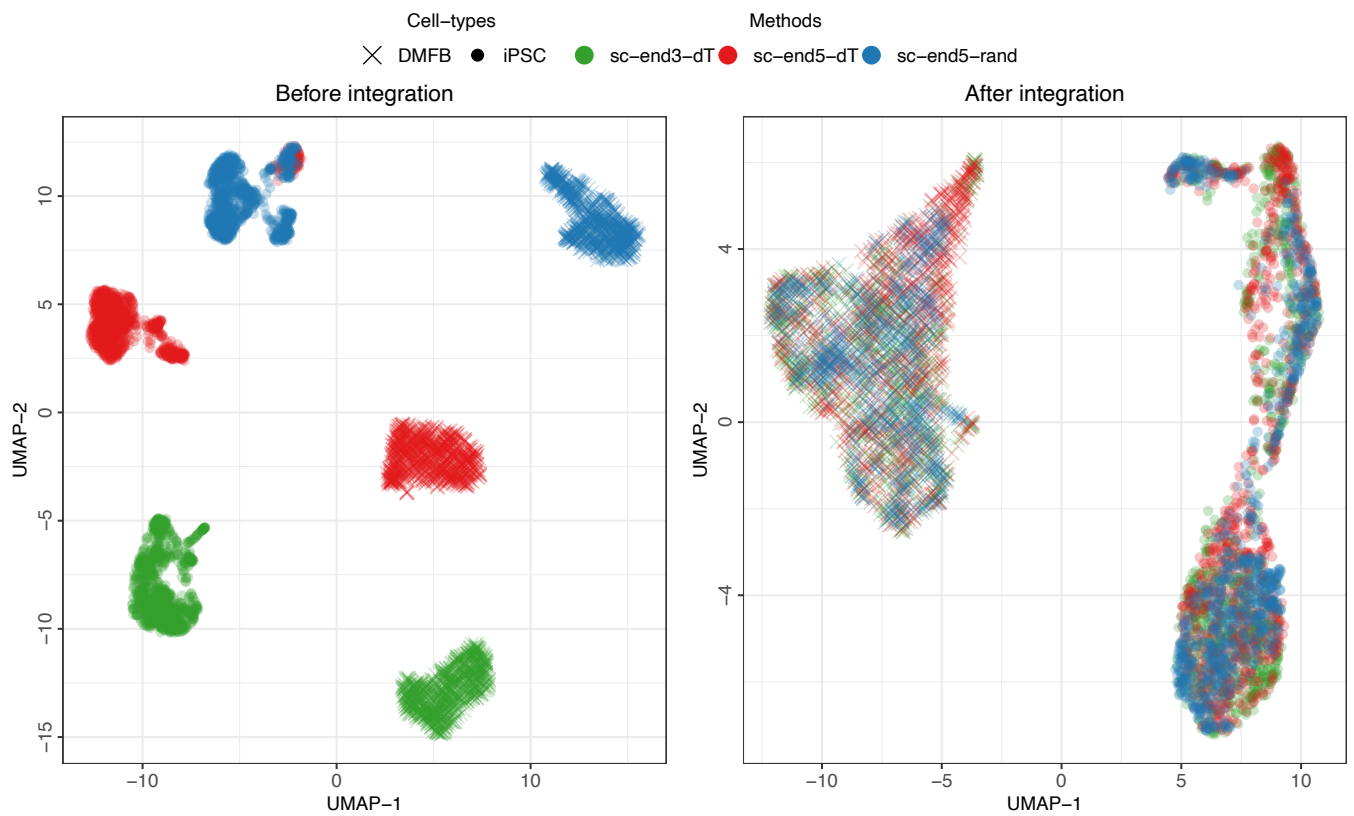

**Supplementary Fig. 3: Integration of sc-RNA-seq methods.** UMAP of sc-RNA-seq methods in iPSC and DMFB before integration (*left*), after *Seurat CCA* integration (*right*) demonstrating the ability to batch correct between different sequencing methods allowing the integration of sc-end5-seq datasets with existing sc-end3-seq resources.



## SCAFE (Single Cell Analysis of Five-prime Ends)

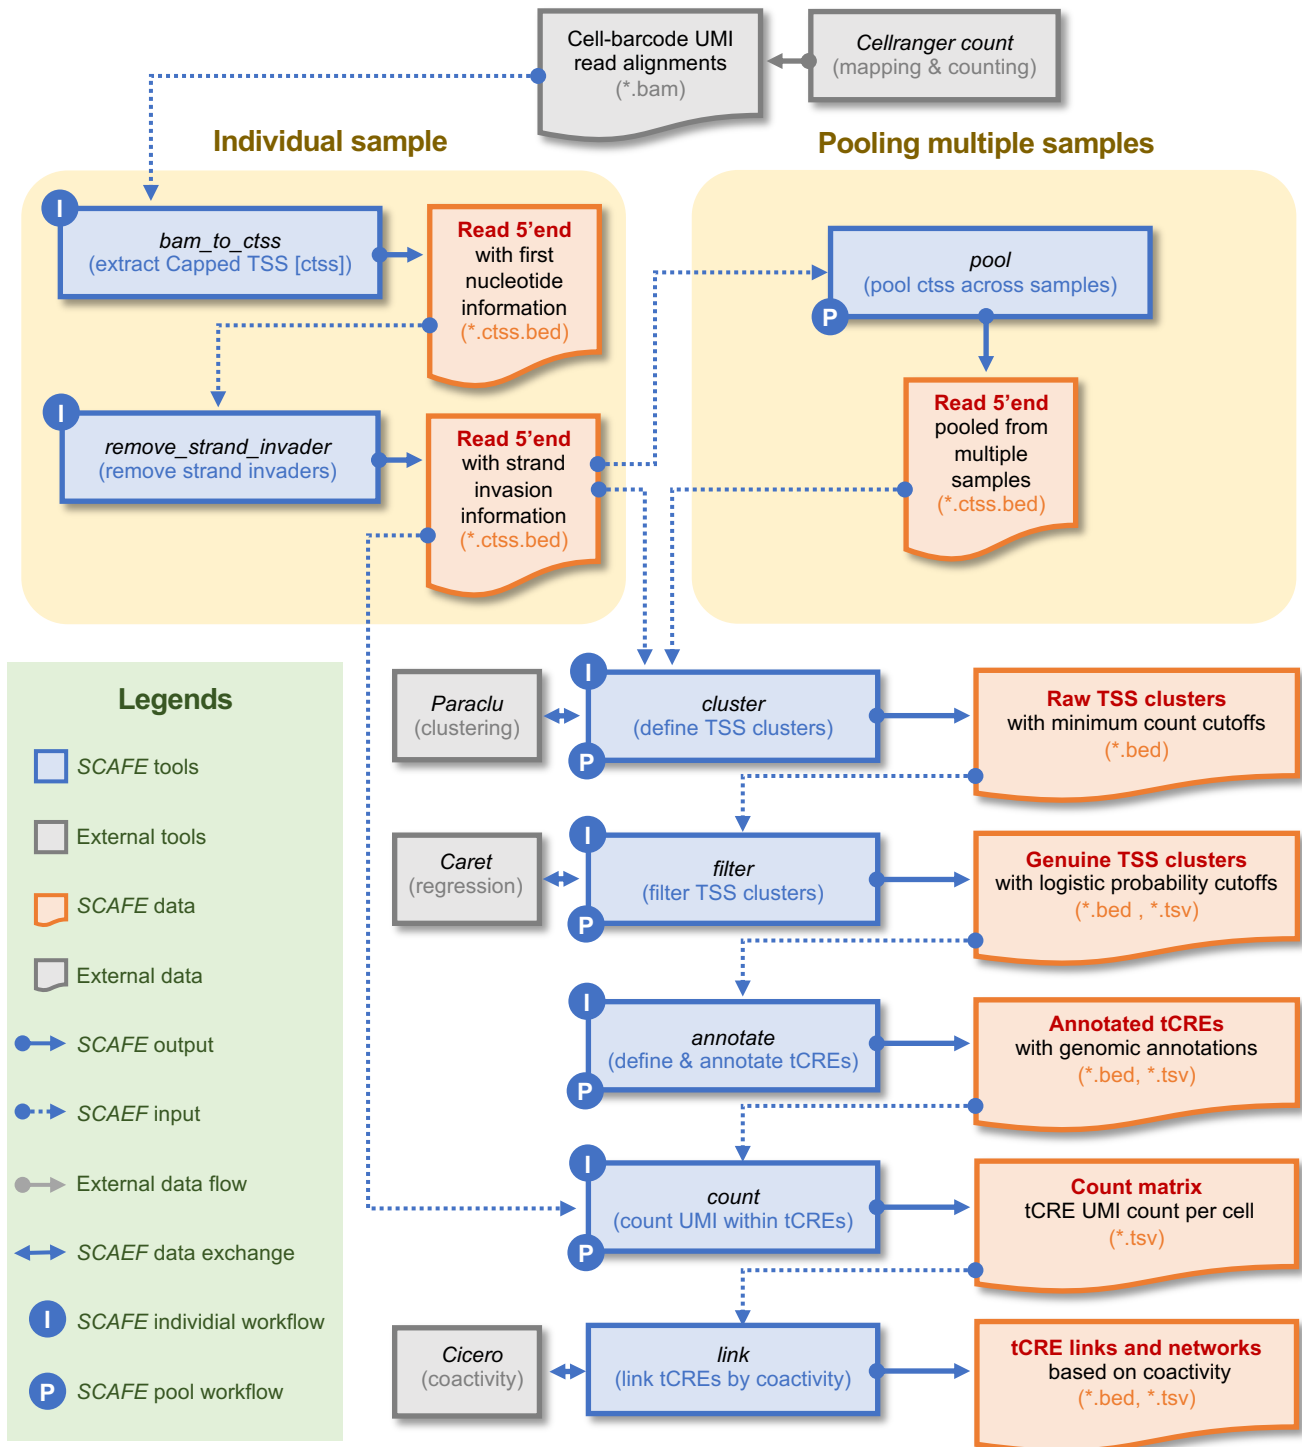

**Supplementary Fig. 4: Overview of SCAPE tool suite.** SCAPE consists of a set of *perl* programs for processing of sc-5end-seq data. Major tools are listed here, for all tools please visit <https://github.com/chung-lab/scafe>. SCAPE accepts read alignment in *bam* format from standard 10x Genomics™ tool *Cellranger*. Tool *bam\_to\_ctss* extracts the 5' position of reads, taking the 5' unencoded-Gs into account. Tool *remove\_strand\_invader* removes read 5'ends that are strand invasion artifacts by aligning the TS oligo sequence to the immediate upstream sequence of the read 5'end. Tool *cluster* performs clustering of read 5'ends using 3rd-party tool *Paraclu*. Tool *filter* extracts the properties of TSS clusters and performs multiple logistic regression to distinguish genuine TSS clusters from artifacts. Tool *annotate* define tCREs by merging closely located TSS clusters and annotate tCREs based on their proximity to known genes. Tool *count* counts the number of UMI within each tCRE in single cells and generates a tCRE-Cell UMI count matrix. SCAPE tools were also implemented workflows for processing of individual samples or pooling of multiple samples.

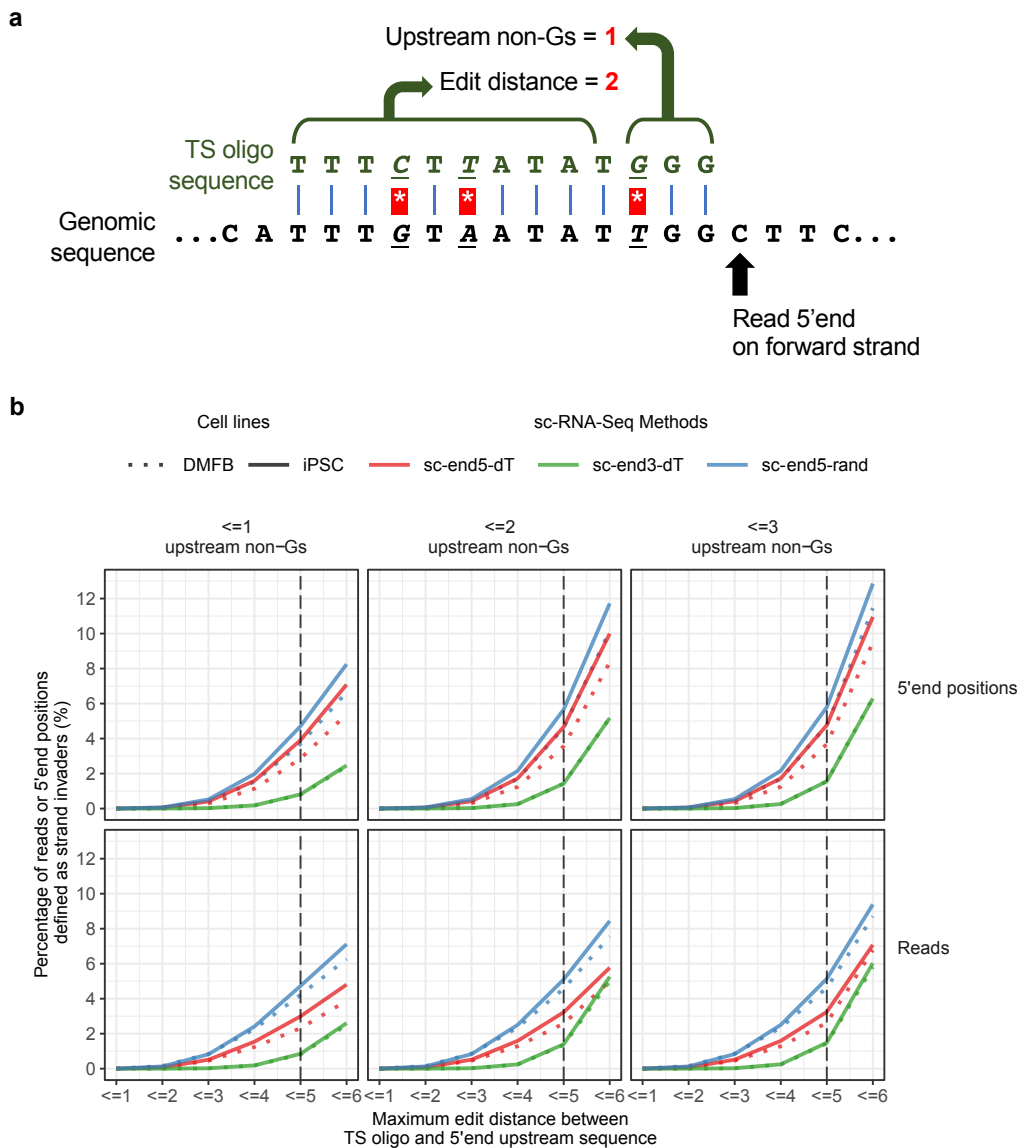

**Supplementary Fig. 5: Detection of strand invasion artefacts.** **a**, Rationale of strand invasion detection. The immediate upstream sequence of the read 5' end were aligned with TS oligo sequence. Number of upstream non-Gs was calculated from the first 3nt of the immediate upstream sequence. Edit distance was calculated from the last 10nt of the alignment. The shown example has 2 edit distances and 1 upstream non-Gs. **b**, Extent of strand invasion artefacts in various sc-RNA-seq methods. Maximum edit distance of 5 (vertical dotted line) and 2 upstream non-Gs (middle column) is chosen as the threshold to define strand invasion artefacts. At this threshold, the extent of strand invasion artefacts is consistently higher in sc-end5-rand (blue), compared to sc-end5-dT (red), in both DMFB and iPSC. sc-end3-dT (green) serves as a negative control of the random genomic background.

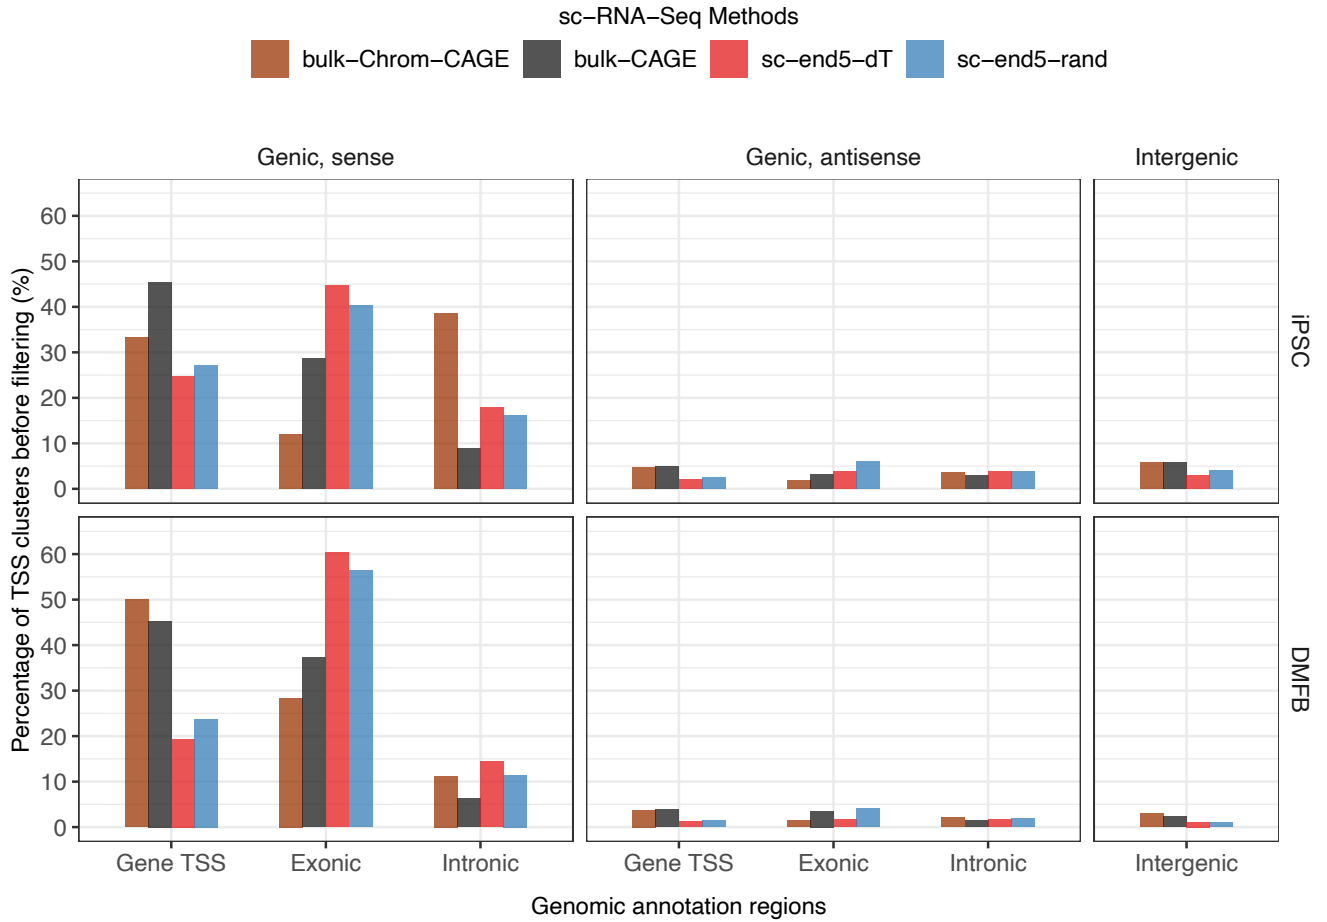

**Supplementary Fig. 6: Genomic distribution of unfiltered TSS clusters.** Unfiltered TSS clusters were assigned to various genic and intergenic annotations, based on their intersection with GENCODE annotation, in specific hierarchical orders (See Methods). In both DMFB and iPSC, a large fraction of TSS clusters were assigned to the exonic and intronic regions in sense orientation, compared to that in the antisense orientation. This could be attributed to the “exon painting” artefacts as discussed, which could be filtered by considering various properties of the TSS clusters.

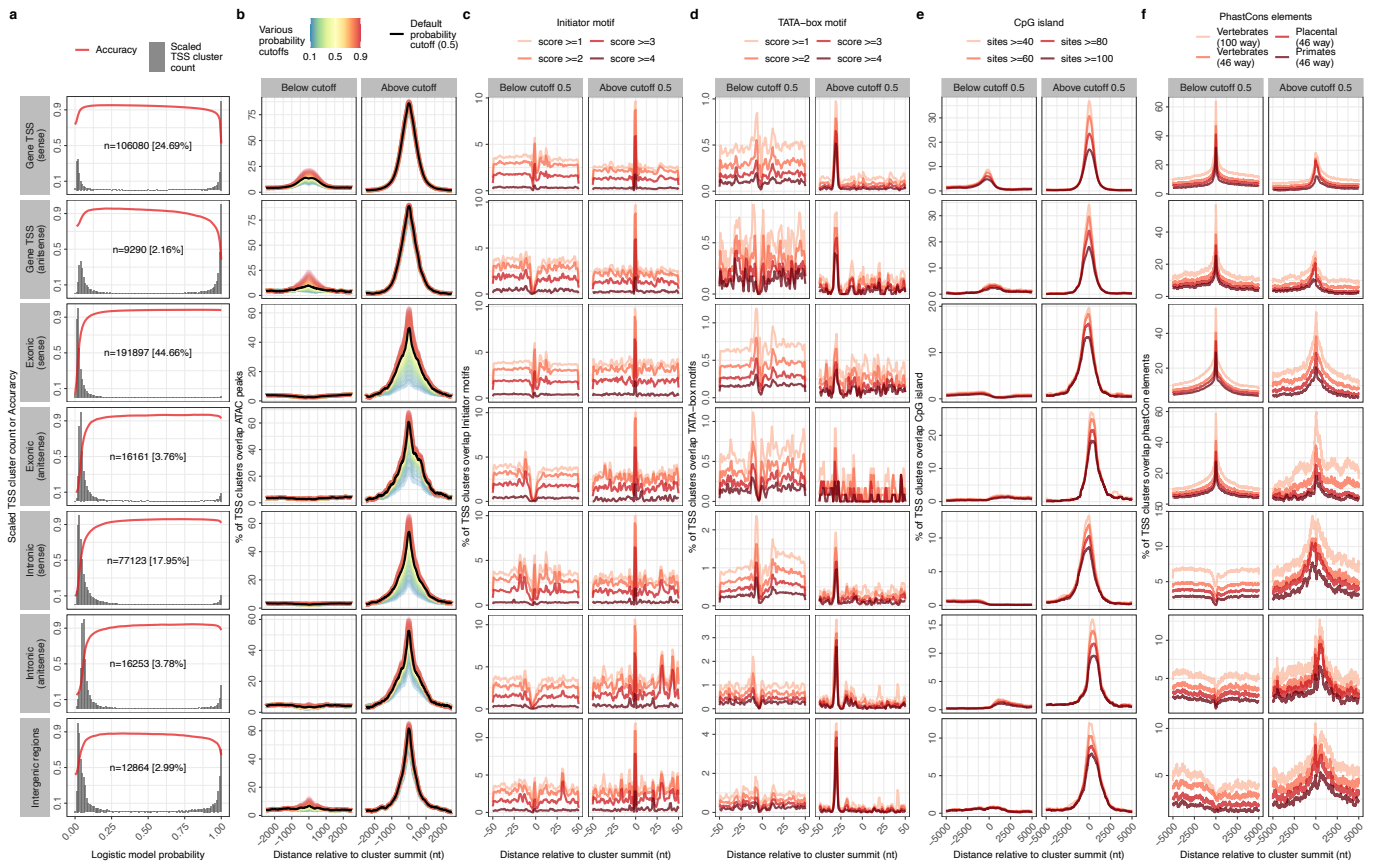

**Supplementary Fig. 7: Properties of logistic model probability cutoffs for identification of genuine TSS clusters.** **a**, Proportion of TSS clusters and accuracy along logistic model probability cutoffs. “n” and “%” refers to the number and percentage of TSS clusters in the category. **b**, Chromatin accessibility around summit of TSS clusters along logistic model probability thresholds. **c,d,e,f**, Distribution of Initiator motif, TATA-box motif, CpG island and PhastCons elements, respectively, around summit of TSS clusters below and above logistic model probability 0.5. Initiator motif and TATA-box motif were predicted on hg19 using *HOMER* (<http://homer.ucsd.edu/homer/motif/>). CpG island and PhastCons elements were downloaded from UCSC table browser (<https://genome.ucsc.edu/>). “Score” in *c* and *d* refers to score of motif prediction from *HOMER*. “Sites” in *e* refers to number of CG dinucleotides. In *f*, 100 ways and 46 ways refer to multiple alignments of 100 and 46 species respectively. Vertebrates, Placental and Primates refer to the scope of species used to define PhastCons elements. Initiator motif and TATA-box motif are, as expected, enriched at  $\sim 0$ nt and  $\sim -30$ nt, respectively, of the TSS cluster above below cutoff 0.5. The enrichment of PhastCons elements at the center of the “Gene TSS” and “Exonic” TSS clusters below cutoff 0.5 can be attributed to their overlap with exon regions, which are relative more conserved than intronic and intergenic regions.



**a**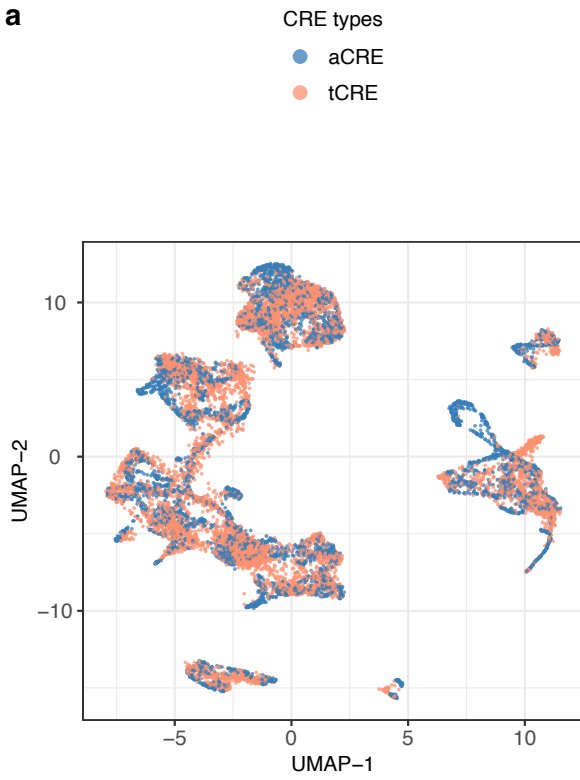**b**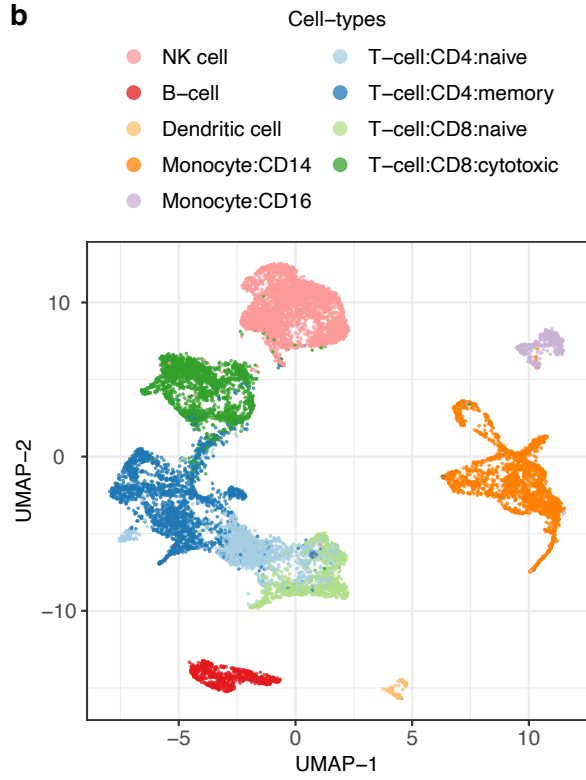

**Supplementary Fig. 8: Integration of tCRE and aCRE.** UMAP of tCRE and aCRE cells after integration by *Seurat CCA*. Colored by technology (*left*) and cell type annotation (*right*), cell type labels have been transferred from tCRE to aCRE.

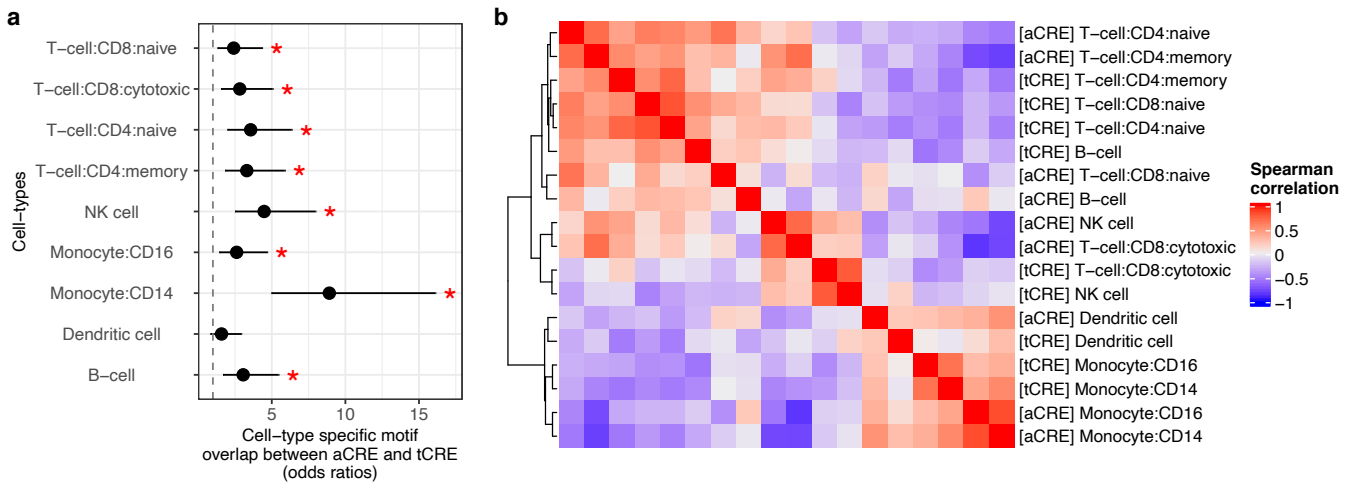

**Supplementary Fig. 9: Cell in tCRE and aCRE. a**, Fisher's exact test for odds ratio of overlap in top 80 cell-type specific TF motifs calculated with *ChromVAR* in aCRE and tCRE. *asterisk*,  $P < 0.05$ ; *error bars*, 95% confidence interval; **b**, Heatmap of common cell type specific motif activity from (a) averaged per cell type (spearman correlation).

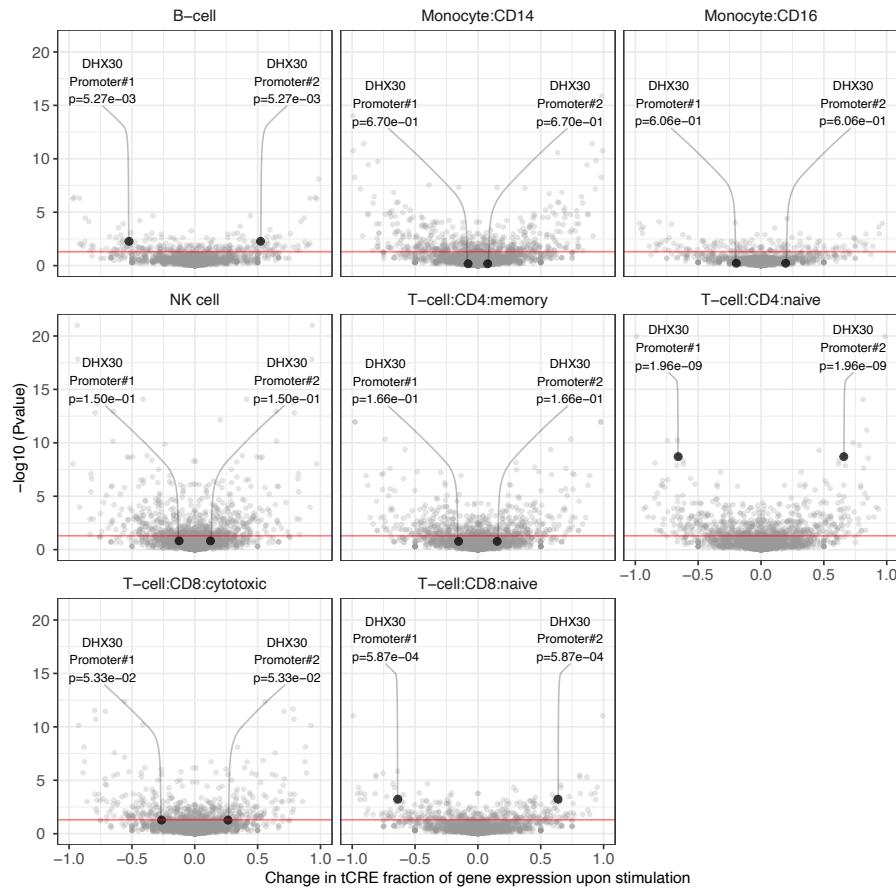

**Supplementary Fig. 10: Alternative promoters in 5'end sc-RNA-seq.** Volcano Plot for genes with multiple proximal tCRE corresponding to alternative promoters, change in mean fraction of gene expression in metacells from each tCRE after stimulation (X-axis),  $-\log_{10}(P)$  of Mann-Whitney U test for change in tCRE usage between metacells (Y-axis). Labeled example tCRE of the *DHX30* gene. Switching from Promoter#1 to Promoter#2 occurs significantly upon stimulation in naive CD4 T-cells naive CD8 T-cells and B-cells.

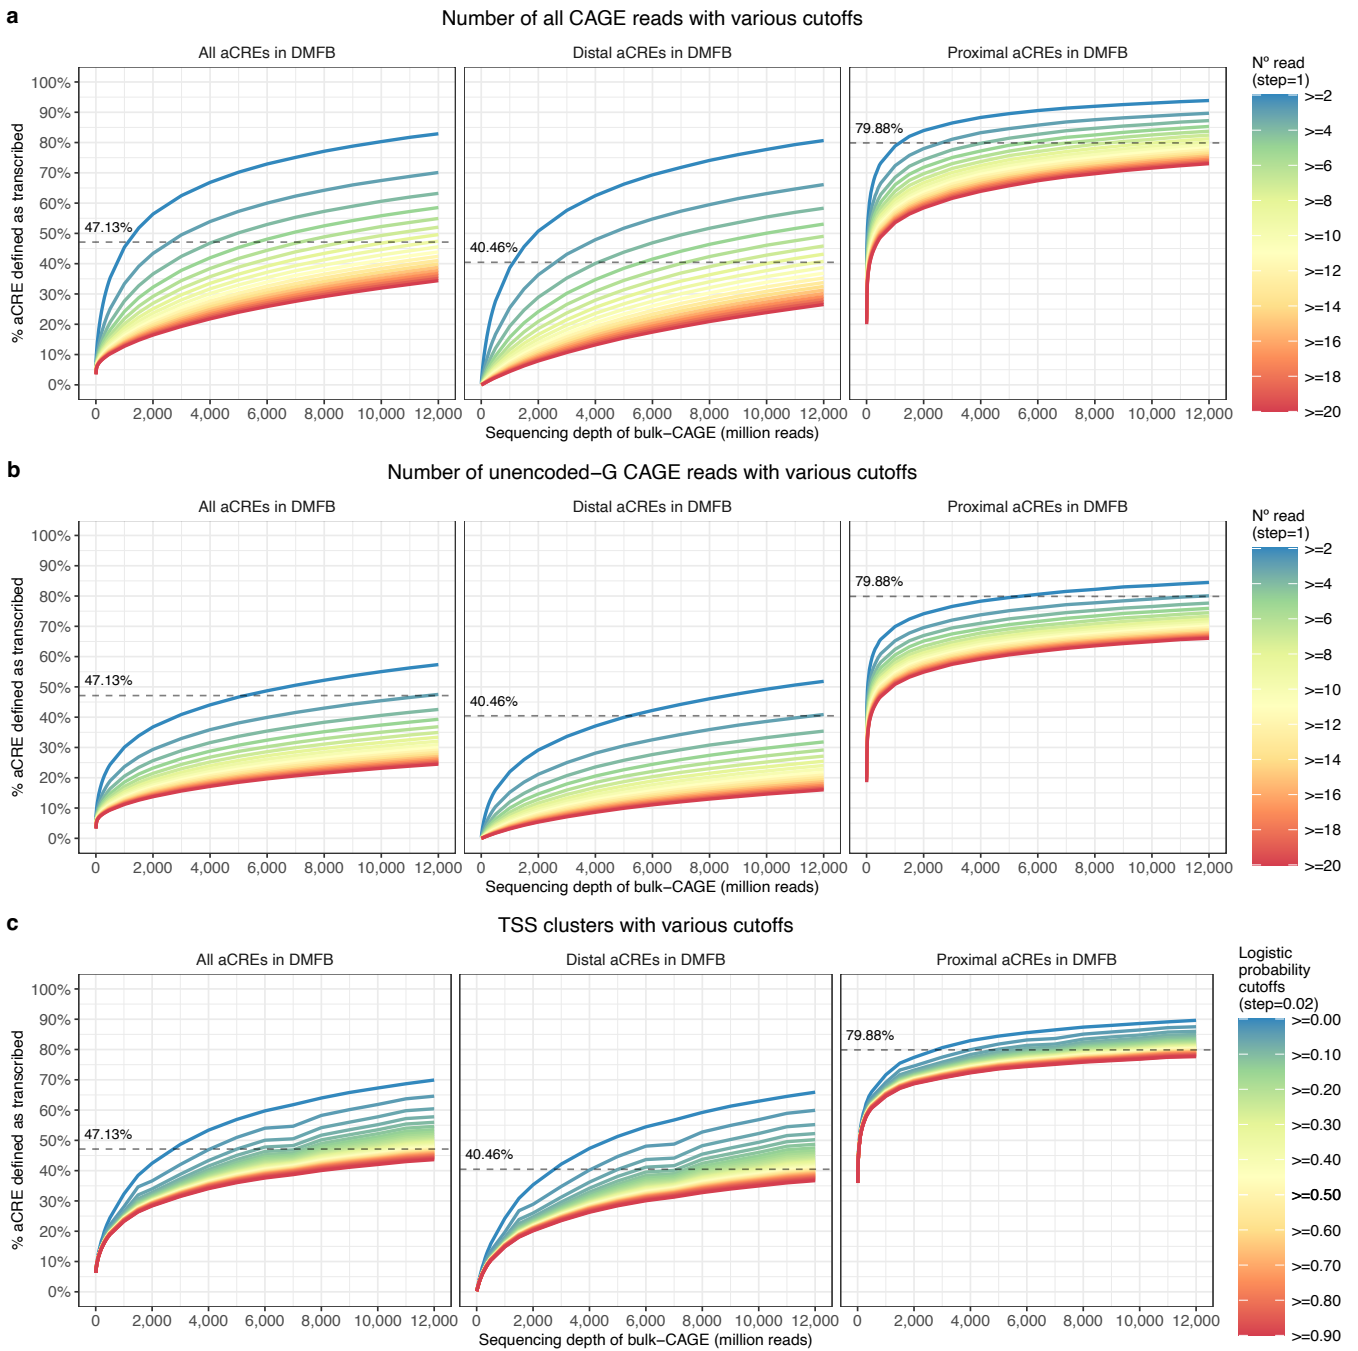

**Supplementary Fig. 11: Percentage aCRE that are transcribed in DMFB.** Estimating the percentage of aCREs that are transcribing using pooled CAGE libraries of DMFB at unprecedented sequencing depth based on **a**, number of all CAGE reads at TSS summit within aCRE, **b**, number of unencoded-G CAGE reads at TSS summit within aCRE, or **c**, highest logistic probability of TSS clusters within aCRE. *Dashed line*, estimate of transcribed aCRE % at highest sequencing depth (i.e. 12,000M) based on TSS clusters with default logistic probability cutoffs (i.e. 0.05).



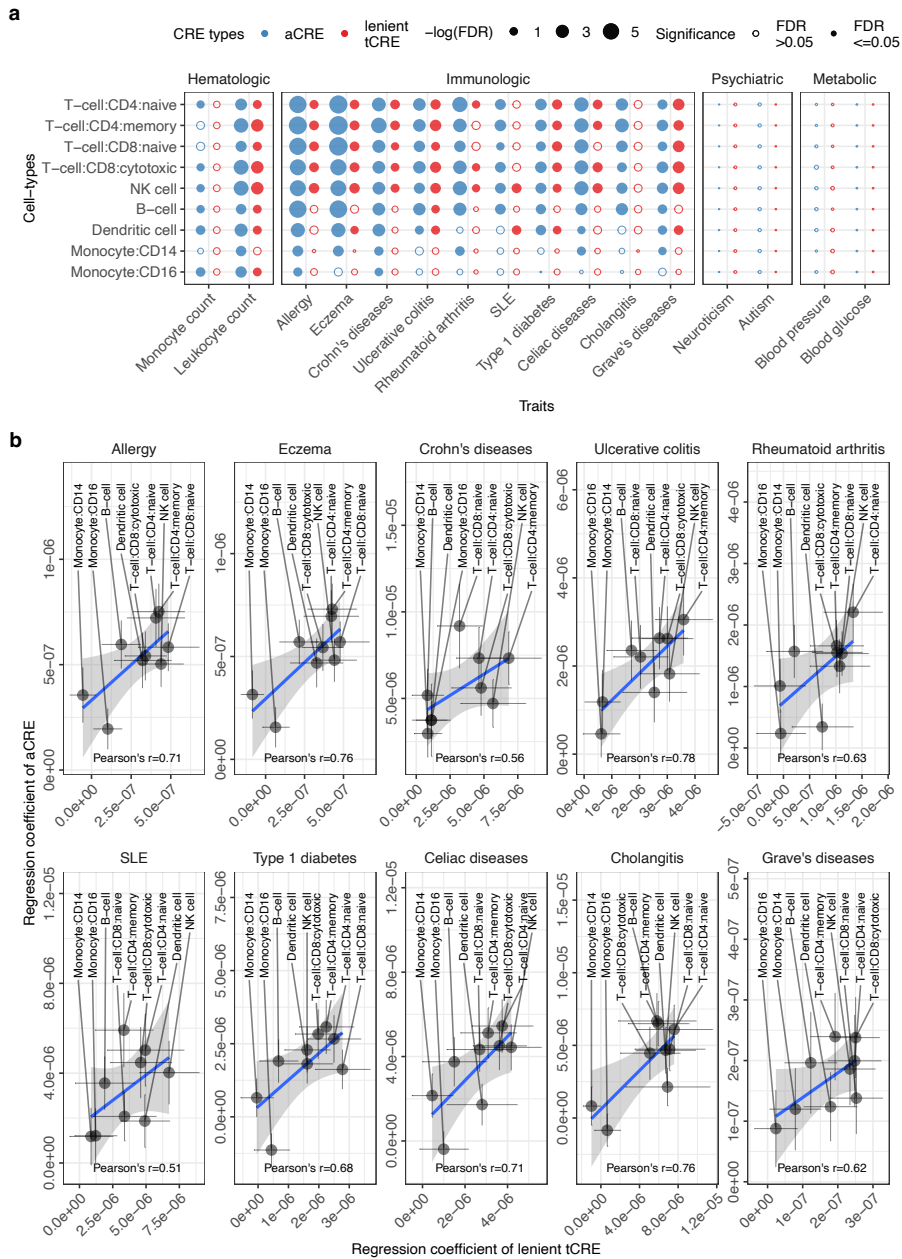

**Supplementary Fig. 12: Heritability enrichment in stimulation-responsive CREs.** **a**, Enrichment of heritability in stimulation-responsive CREs in various cell-types. Solid circles, significant enrichments with FDR <0.05. **b**, Ranking of cell-type relevance to diseases based on heritability enrichment. Regression coefficient, from the analysis in (a), can be interpreted as the extent of heritability enrichment, and thus cell-type relevance. Error bars, standard error of the estimate. Blue line and grey shade, linear regression mean and 95% confidence intervals.

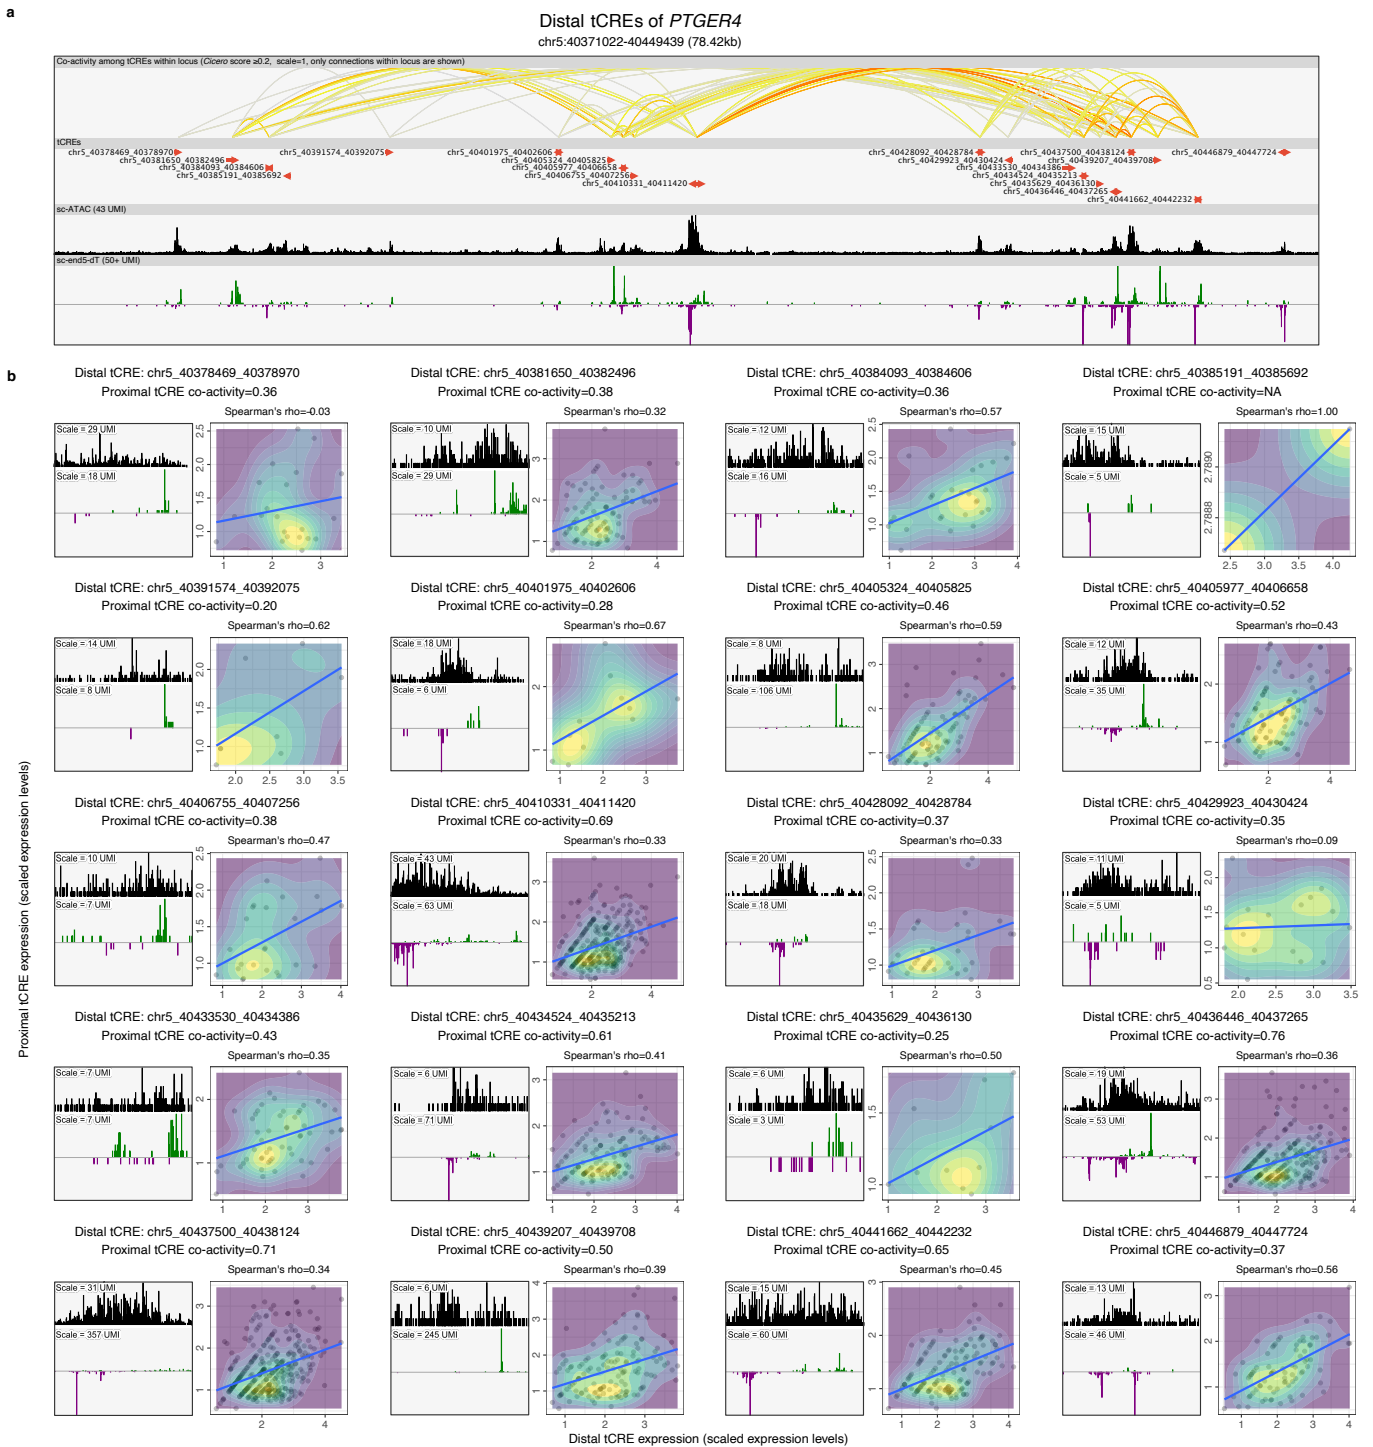

**Supplementary Fig. 13: Distal tCRE activity at the *PTGER4* locus.** **a**, Overview of the distal tCREs in close proximity to *PTGER4*. Twenty distal tCREs were shown. Co-activity among these 20 tCREs, with *Cicero* co-activity score  $\geq 0.2$ , is represented by the color of the arcs. Only coactivity among tCRE within the view was shown. Resting and stimulated PBMC data were pooled in the sc-ATAC-seq and sc-end5-dT tracks. *Green* and *blue* bars in the sc-end5-dT track represent the forward and reverse strand signal. The view was generated in the Zenbu genome browser with modifications. **b**, Individual distal tCREs and their coactivity with *PTGER4* proximal tCRE. For each distal tCRE in **(a)**, a zoom-in view at the locus is shown. The scale of the signal bars is indicated as UMI counts. Expression of individual distal tCRE and the *PTGER4* proximal tCRE within single cells are plotted. Only cells with non-zero values in both tCREs are plotted. *Blue line*, mean of linear regression.
